# Supplementary material for: Current and Expected Trends for the Marine Chitin/Chitosan and Collagen Value Chains
Source: MDPI journal article supplement (doi:10.3390/md21120605), 2023-11-23
Supplement: s1 [file s1]

Table S1 - Keywords Combinations submitted to Scopus and WoS and results without duplicates

| Keyword Combinations                                                                                                            | Number of papers |
|---------------------------------------------------------------------------------------------------------------------------------|------------------|
| Chitin AND Chitosan AND (Aquaculture OR Fisheries OR Industr*) AND (Crustaceans OR Shellfish OR Marine)                         | 453              |
| Chitin AND Chitosan AND (Value Chain OR Market OR Market Demand OR ROI) AND (Crustaceans OR Shellfish OR Marine)                | 38               |
| Chitin AND Chitosan AND Bio* Waste AND (Marine Resources OR Crustaceans OR Shellfish OR Marine)                                 | 38               |
| (Collagen hydrolysate OR Collagen) AND (Aquaculture OR Fisheries OR Industr*) AND (Crustaceans OR Shellfish OR Marine)          | 334              |
| (Collagen hydrolysate OR Collagen) AND (Value Chain OR Market OR Market Demand OR ROI) AND (Crustaceans OR Shellfish OR Marine) | 42               |
| (Collagen hydrolysate OR Collagen) AND Bio* Waste AND (Crustaceans OR Shellfish OR Marine)                                      | 12               |
|                                                                                                                                 | 917              |
