# Supplementary material for: Current and Expected Trends for the Marine Chitin/Chitosan and Collagen Value Chains
Source: MDPI journal article supplement (doi:10.3390/md21120605), 2023-11-23
Supplement: s1 [file s1]

Table S2 - Assessed publications

|                                                                                                                                                                                                                                                                                                                                                                                                                                               |
|-----------------------------------------------------------------------------------------------------------------------------------------------------------------------------------------------------------------------------------------------------------------------------------------------------------------------------------------------------------------------------------------------------------------------------------------------|
| Abdelmalek, B. E., Sila, A., Haddar, A., Bougatef, A., & Ayadi, M. A. (2017). $\beta$ -Chitin and chitosan from squid <i>gladius</i> : Biological activities of chitosan and its application as clarifying agent for apple juice. <i>International Journal of Biological Macromolecules</i> , 104, 953–962. <a href="https://doi.org/10.1016/j.ijbiomac.2017.06.107">https://doi.org/10.1016/j.ijbiomac.2017.06.107</a>                       |
| Abdullah, T., Gzara, L., Simonetti, G., Alshahrie, A., Salah, N., Morganti, P., Chianese, A., Fallahi, A., Tamayol, A., Bencherif, S., & Memic, A. (2018). The Effect of Poly (Glycerol Sebacate) Incorporation within Hybrid Chitin–Lignin Sol–Gel Nanofibrous Scaffolds. <i>Materials</i> , 11(3), 451. <a href="https://doi.org/10.3390/ma11030451">https://doi.org/10.3390/ma11030451</a>                                                 |
| Aboudamia, F. Z., Kharroubi, M., Neffa, M., Aatab, F., Hanoune, S., Bouchdoug, M., & Jaouad, A. (2020). Potential of discarded sardine scales ( <i>Sardina pilchardus</i> ) as chitosan sources. <i>Journal of the Air and Waste Management Association</i> , 70(11), 1186–1197. <a href="https://doi.org/10.1080/10962247.2020.1813840">https://doi.org/10.1080/10962247.2020.1813840</a>                                                    |
| Acharya, P. P., Kupendra, M. H., Fasim, A., More, S. S., & Murthy, V. K. (2022). A comparative assessment of collagen type 1 from silver carp (fresh water) and milk shark(marine) fish waste. <i>3 Biotech</i> , 12(3). <a href="https://doi.org/10.1007/s13205-022-03114-5">https://doi.org/10.1007/s13205-022-03114-5</a>                                                                                                                  |
| Addad, S., Exposito, J.-Y., Faye, C., Ricard-Blum, S., & Lethias, C. (2011). Isolation, characterization and biological evaluation of jellyfish collagen for use in biomedical applications. <i>Marine Drugs</i> , 9(6), 967–983. <a href="https://doi.org/10.3390/md9060967">https://doi.org/10.3390/md9060967</a>                                                                                                                           |
| Águila-Almanza, E., Low, S. S. S., Hernández-Cocoletzi, H., Atonal-Sandoval, A., Rubio-Rosas, E., Violante-González, J., & Show, P. L. L. (2021). Facile and green approach in managing sand crab carapace biowaste for obtention of high deacetylation percentage chitosan. <i>Journal of Environmental Chemical Engineering</i> , 9(3). <a href="https://doi.org/10.1016/j.jece.2021.105229">https://doi.org/10.1016/j.jece.2021.105229</a> |
| Ahmed, A., Hassan, A., & Nour, M. (2021). Utilization of chitosan extracted from shrimp shell waste in wastewater treatment as low cost biosorbent. <i>Egyptian Journal of Chemistry</i> , 0–0. <a href="https://doi.org/10.21608/ejchem.2020.43166.2871">https://doi.org/10.21608/ejchem.2020.43166.2871</a>                                                                                                                                 |
| Ahmed, M., Anand, A., Verma, A. K., & Patel, R. (2022). In-vitro self-assembly and antioxidant properties of collagen type I from <i>Lutjanus erythropterus</i> , and <i>Pampus argenteus</i> skin. <i>Biocatalysis and Agricultural Biotechnology</i> , 43. <a href="https://doi.org/10.1016/j.bcab.2022.102412">https://doi.org/10.1016/j.bcab.2022.102412</a>                                                                              |
| Akita, M., Kono, T., Lloyd, K., Mitsui, T., Morioka, K., & Adachi, K. (2019). Biochemical study of type I collagen purified from skin of warm sea teleost Mahi mahi ( <i>Coryphaena hippurus</i> ), with a focus on thermal and physical stability. <i>Journal of Food Biochemistry</i> , 43(11). <a href="https://doi.org/10.1111/jfbc.13013">https://doi.org/10.1111/jfbc.13013</a>                                                         |
| Al Sagheer, F. A., Al-Sughayer, M. A., Muslim, S., & Elsabee, M. Z. (2009). Extraction and characterization of chitin and chitosan from marine sources in Arabian Gulf. <i>Carbohydrate Polymers</i> , 77(2), 410–419. <a href="https://doi.org/10.1016/J.CARBPOL.2009.01.032">https://doi.org/10.1016/J.CARBPOL.2009.01.032</a>                                                                                                              |
| Al-Ali, R. M., Al-Hilifi, S. A., & Rashed, M. M. A. (2021). Fabrication, characterization, and anti-free radical performance of edible packaging-chitosan film synthesized from shrimp shell incorporated with ginger essential oil.                                                                                                                                                                                                          |

*Journal of Food Measurement and Characterization*, 15(4), 2951–2962. <https://doi.org/10.1007/s11694-021-00875-0>

Aldebs, A. I., Abdulameer, H. A., & Abudken, A. M. (2022). Isolation and Characterization of Collagen Extracted from Fish Scales and Applied as Anti-TNF $\alpha$  Protein. *Bahrain Medical Bulletin*, 44(4), 1177–1180. <https://www.scopus.com/inward/record.uri?eid=2-s2.0-85146392330&partnerID=40&md5=78304c47ac7838d1bd0a1159622c9bdd>

Alves, A. L., Marques, A. L. P., Martins, E., Silva, T. H., & Reis, R. L. (2017). Cosmetic potential of Marine fish skin collagen. *Cosmetics*, 4(4). <https://doi.org/10.3390/cosmetics4040039>

Alves, H. J., Furman, M., Kugelmeier, C. L., De Oliveira, C. R., Bach, V. R., Lupatini, K. N., Neves, A. C., & Arantes, M. K. (2017). Effect of shrimp shells milling on the molar mass of chitosan. *Polimeros*, 27(1), 41–47. <https://doi.org/10.1590/0104-1428.2354>

Amer, M. S., & Ibrahim, H. A. H. (2019). Chitosan from marine-derived *Penicillium spinulosum* MH2 cell wall with special emphasis on its antimicrobial and antifouling properties. *The Egyptian Journal of Aquatic Research*, 45(4), 359–365. <https://doi.org/10.1016/J.EJAR.2019.11.007>

Amer, O. A., Ali, S. S., Azab, M., El-Shouny, W. A., Sun, J., & Mahmoud, Y. A.-G. (2022). Exploring new marine bacterial species, *Alcaligenes faecalis* Alca F2018 valued for bioconversion of shrimp chitin to chitosan for concomitant biotechnological applications. *International Journal of Biological Macromolecules*, 196, 35–45. <https://doi.org/10.1016/j.ijbiomac.2021.12.033>

Amiri, H., Aghbashlo, M., Sharma, M., Gaffey, J., Manning, L., Basri, S. M. M., Kennedy, J. F., Gupta, V. K., & Tabatabaei, M. (2022). Chitin and chitosan derived from crustacean waste valorization streams can support food systems and the UN Sustainable Development Goals. *NATURE FOOD*, 3(10), 822–828. <https://doi.org/10.1038/s43016-022-00591-y>

Aneesh, P. A., Anandan, R., Kumar, L. R. G., Ajeeshkumar, K. K., Kumar, K. A., & Mathew, S. (2020). A step to shell biorefinery—Extraction of astaxanthin-rich oil, protein, chitin, and chitosan from shrimp processing waste. *Biomass Conversion and Biorefinery*. <https://doi.org/10.1007/s13399-020-01074-5>

Anouar, A., Gurrane, A., Álvarez, E., Katir, N., Primo, A., Garcia, H., & El Kadib, A. (2022). Nanosized copper stabilized on ternary P, N, S-doped graphene from chitosan shellfish waste: preparation and catalysis of single and double A3-type amine coupling. *Materials Today Sustainability*, 18. <https://doi.org/10.1016/j.mtsust.2022.100109>

Apetroaei, M., Manea, A.-M., Tihan, G., Zgârian, R., Schroder, V., & Rău, I. (2017). Improved method of chitosan extraction from different crustacean species of Romanian black sea coast. *UPB Scientific Bulletin, Series B: Chemistry and Materials Science*, 79(1), 25–36.

Arias-Moscoso, J. L., Soto-Valdez, H., Plascencia-Jatomea, M., Vidal-Quintanar, R.-L., Rouzaud-Sández, O., & Ezquerro-Brauer, J. M. (2011). Composites of chitosan with acid-soluble collagen from jumbo squid (*Dosidicus gigas*) by-products. *Polymer International*, 60(6), 924–931. <https://doi.org/10.1002/pi.3048>

|                                                                                                                                                                                                                                                                                                                                                                                                                                                                                                                                                                  |
|------------------------------------------------------------------------------------------------------------------------------------------------------------------------------------------------------------------------------------------------------------------------------------------------------------------------------------------------------------------------------------------------------------------------------------------------------------------------------------------------------------------------------------------------------------------|
| <p>Arulmoorthy, M. P., Anbarasi, G., Srinivasan, M., &amp; Vishnupriya, B. (2022). Biosynthesis and characterization of chitosan based hydrogel: A potential in vitro wound healing agent. In MATERIALS TODAY-PROCEEDINGS (Vol. 48, Issue International Conference on Impact of Innovations in Science and Technology for Societal Development (IISTSD)-Materials Science, pp. 263–275). <a href="https://doi.org/10.1016/j.matpr.2020.07.186">https://doi.org/10.1016/j.matpr.2020.07.186</a> WE - Conference Proceedings Citation Index - Science (CPCI-S)</p> |
| <p>Babeanu, N., Radu, N., Enascuta, C. E., Alexandrescu, E., Ganciarov, M., Mohammed, M. S. O., Suica-Bunghez, I. R., Senin, R., Ursu, M., &amp; Bostan, M. (2022). Obtaining and Characterizing Composite Biomaterials of Animal Resources with Potential Applications in Regenerative Medicine. POLYMERS, 14(17). <a href="https://doi.org/10.3390/polym14173544">https://doi.org/10.3390/polym14173544</a> WE - Science Citation Index Expanded (SCI-EXPANDED)</p>                                                                                            |
| <p>Balde, A., Hasan, A., Joshi, I., &amp; Nazeer, R. A. (2020). Preparation and optimization of chitosan nanoparticles from discarded squilla (<i>Carinosquilla multicaudata</i>) shells for the delivery of anti-inflammatory drug: Diclofenac. Journal of the Air and Waste Management Association, 70(12), 1227–1235. <a href="https://doi.org/10.1080/10962247.2020.1727588">https://doi.org/10.1080/10962247.2020.1727588</a></p>                                                                                                                           |
| <p>Balitaan, J. N. I., Yeh, J. M., &amp; Santiago, K. S. (2020). Marine waste to a functional biomaterial: Green facile synthesis of modified-<math>\beta</math>-chitin from <i>Uroteuthis duvauceli</i> pens (<i>gladius</i>). International Journal of Biological Macromolecules, 154, 1565–1575. <a href="https://doi.org/10.1016/J.IJBIOMAC.2019.11.041">https://doi.org/10.1016/J.IJBIOMAC.2019.11.041</a></p>                                                                                                                                              |
| <p>Banerjee, P., &amp; Das, J. (2017). Biomimetic synthesis of nanocrystalline hydroxyapatite from sharkskin collagen. Bioinspired, Biomimetic and Nanobiomaterials, 7(1), 27–36. <a href="https://doi.org/10.1680/jbibr.16.00018">https://doi.org/10.1680/jbibr.16.00018</a></p>                                                                                                                                                                                                                                                                                |
| <p>Barber, P. S., Griggs, C. S., Bonner, J. R., &amp; Rogers, R. D. (2013). Electrospinning of chitin nanofibers directly from an ionic liquid extract of shrimp shells. Green Chemistry, 15(3), 601. <a href="https://doi.org/10.1039/c2gc36582k">https://doi.org/10.1039/c2gc36582k</a></p>                                                                                                                                                                                                                                                                    |
| <p>Bardakova, K. N., Akopova, T. A., Kurkov, A. V., Goncharuk, G. P., Butnaru, D. V., Burdukovskii, V. F., Antoshin, A. A., Farion, I. A., Zharikova, T. M., Shekhter, A. B., Yusupov, V. I., Timashev, P. S., &amp; Rochev, Y. A. (2019). From Aggregates to Porous Three-Dimensional Scaffolds through a Mechanochemical Approach to Design Photosensitive Chitosan Derivatives. Marine Drugs, 17(1), 48. <a href="https://doi.org/10.3390/md17010048">https://doi.org/10.3390/md17010048</a></p>                                                              |
| <p>Batista, M. P., Fernández, N., Gaspar, F. B., Bronze, M. D. R., &amp; Duarte, A. R. C. (2022). Extraction of Biocompatible Collagen From Blue Shark Skins Through the Conventional Extraction Process Intensification Using Natural Deep Eutectic Solvents. Frontiers in Chemistry, 10. <a href="https://doi.org/10.3389/fchem.2022.937036">https://doi.org/10.3389/fchem.2022.937036</a></p>                                                                                                                                                                 |
| <p>Bazargan-Lari, R., Bahrololoom, M. E., &amp; Nemati, A. (2011). Sorption behavior of Zn (II) ions by low cost and biological natural hydroxyapatite/chitosan composite from industrial waste water. Journal of Food, Agriculture and Environment, 9(3–4), 892–897.</p>                                                                                                                                                                                                                                                                                        |
| <p>Beaney, P., Lizardi-Mendoza, J., &amp; Healy, M. (2005). Comparison of chitins produced by chemical and bioprocessing methods. Journal of Chemical Technology and Biotechnology, 80(2), 145–150. <a href="https://doi.org/10.1002/jctb.1164">https://doi.org/10.1002/jctb.1164</a></p>                                                                                                                                                                                                                                                                        |
| <p>Bedekar, A. N., Pise, A. C., Thatte, C. S., &amp; Rathnam, M. V. (2010). Study on optimization of carboxymethylation of chitosan obtained from squilla chitin. Asian Journal of Chemistry, 22(10), 7675–7682.</p>                                                                                                                                                                                                                                                                                                                                             |

|                                                                                                                                                                                                                                                                                                                                                                                                                                                                              |
|------------------------------------------------------------------------------------------------------------------------------------------------------------------------------------------------------------------------------------------------------------------------------------------------------------------------------------------------------------------------------------------------------------------------------------------------------------------------------|
| <p>Bernardi, F., Zadinelo, I. V., Alves, H. J., Meurer, F., &amp; dos Santos, L. D. (2018). Chitins and chitosans for the removal of total ammonia of aquaculture effluents. <i>Aquaculture</i>, 483, 203–212. <a href="https://doi.org/10.1016/j.aquaculture.2017.10.027">https://doi.org/10.1016/j.aquaculture.2017.10.027</a></p>                                                                                                                                         |
| <p>Bisht, M., Martins, M., Dias, A. C. R. V., Ventura, S. P. M., &amp; Coutinho, J. A. P. (2021). Uncovering the potential of aqueous solutions of deep eutectic solvents on the extraction and purification of collagen type I from Atlantic codfish (<i>Gadus morhua</i>). <i>Green Chemistry</i>, 23(22), 8940–8948. <a href="https://doi.org/10.1039/d1gc01432c">https://doi.org/10.1039/d1gc01432c</a></p>                                                              |
| <p>Blanco, M., Vázquez, J. A., Pérez-Martín, R. I., &amp; Sotelo, C. G. (2019). Collagen extraction optimization from the skin of the small-spotted catshark (<i>S. Canicula</i>) by response surface methodology. <i>Marine Drugs</i>, 17(1). <a href="https://doi.org/10.3390/md17010040">https://doi.org/10.3390/md17010040</a></p>                                                                                                                                       |
| <p>Borzacchiello, A., Ambrosio, L., Netti, P. A., Nicolais, L., Peniche, C., Gallardo, A., &amp; San Roman, J. (2001). Chitosan-based hydrogels: Synthesis and characterization. <i>Journal of Materials Science: Materials in Medicine</i>, 12(10–12), 861–864. <a href="https://doi.org/10.1023/A:1012851402759">https://doi.org/10.1023/A:1012851402759</a></p>                                                                                                           |
| <p>Bradić, B., Novak, U., &amp; Likozar, B. (2019). Crustacean shell bio-refining to chitin by natural deep eutectic solvents. <i>Green Processing and Synthesis</i>, 9(1), 13–25. <a href="https://doi.org/10.1515/gps-2020-0002">https://doi.org/10.1515/gps-2020-0002</a></p>                                                                                                                                                                                             |
| <p>Buscaglia, M., Guérard, F., Roquefort, P., Aubry, T., Fauchon, M., Toueix, Y., Stiger-Pouvreau, V., Hellio, C., &amp; Le Blay, G. (2022). Mechanically Enhanced <i>Salmo salar</i> Gelatin by Enzymatic Cross-linking: Premise of a Bioinspired Material for Food Packaging, Cosmetics, and Biomedical Applications. <i>Marine Biotechnology</i>, 24(4), 801–819. <a href="https://doi.org/10.1007/s10126-022-10150-y">https://doi.org/10.1007/s10126-022-10150-y</a></p> |
| <p>Cahú, T. B., Santos, S. D., Mendes, A., Córdula, C. R., Chavante, S. F., Carvalho, L. B., Nader, H. B., &amp; Bezerra, R. S. (2012). Recovery of protein, chitin, carotenoids and glycosaminoglycans from Pacific white shrimp (<i>Litopenaeus vannamei</i>) processing waste. <i>Process Biochemistry</i>, 47(4), 570–577. <a href="https://doi.org/10.1016/j.procbio.2011.12.012">https://doi.org/10.1016/j.procbio.2011.12.012</a></p>                                 |
| <p>Cardozo, F. A., Facchinatto, W. M., Colnago, L. A., Campana-Filho, S. P., &amp; Pessoa, A. (2019). Bioproduction of N-acetyl-glucosamine from colloidal <math>\alpha</math>-chitin using an enzyme cocktail produced by <i>Aeromonas caviae</i> CHZ306. <i>World Journal of Microbiology and Biotechnology</i>, 35(8), 114. <a href="https://doi.org/10.1007/s11274-019-2694-x">https://doi.org/10.1007/s11274-019-2694-x</a></p>                                         |
| <p>Carrera, M., Ezquerro-Brauer, J. M., &amp; Aubourg, S. P. (2020). Characterization of the jumbo squid (<i>Dosidicus gigas</i>) skin by-product by shotgun proteomics and protein-based bioinformatics. <i>Marine Drugs</i>, 18(1). <a href="https://doi.org/10.3390/md18010031">https://doi.org/10.3390/md18010031</a></p>                                                                                                                                                |
| <p>Carvalho, A. M., Marques, A. P., Silva, T. H., &amp; Reis, R. L. (2018). Evaluation of the potential of collagen from codfish skin as a biomaterial for biomedical applications. <i>Marine Drugs</i>, 16(12). <a href="https://doi.org/10.3390/md16120495">https://doi.org/10.3390/md16120495</a></p>                                                                                                                                                                     |
| <p>Casanova, F., Mohammadifar, M. A., Jahromi, M., Petersen, H. O., Sloth, J. J., Eybye, K. L., Kobbeltgaard, S., Jakobsen, G., &amp; Jessen, F. (2020). Physico-chemical, structural and techno-functional properties of gelatin from saithe (<i>Pollachius virens</i>) skin. <i>International Journal of Biological Macromolecules</i>, 156, 918–927. <a href="https://doi.org/10.1016/j.IJBIOMAC.2020.04.047">https://doi.org/10.1016/j.IJBIOMAC.2020.04.047</a></p>      |

|                                                                                                                                                                                                                                                                                                                                                                                             |
|---------------------------------------------------------------------------------------------------------------------------------------------------------------------------------------------------------------------------------------------------------------------------------------------------------------------------------------------------------------------------------------------|
| Chen, B., Yu, L., Wu, J., Qiao, K., Cui, L., Qu, H., Su, Y., Cai, S., Liu, Z., & Wang, Q. (2022). Effects of Collagen Hydrolysate From Large Hybrid Sturgeon on Mitigating Ultraviolet B-Induced Photodamage. <i>Frontiers in Bioengineering and Biotechnology</i> , 10. <a href="https://doi.org/10.3389/fbioe.2022.908033">https://doi.org/10.3389/fbioe.2022.908033</a>                  |
| Chen, S., Yang, Q., Chen, X., Tian, Y., Liu, Z., & Wang, S. (2020). Bioactive peptides derived from crimson snapper and: In vivo anti-aging effects on fat diet-induced high fat <i>Drosophila melanogaster</i> . <i>Food and Function</i> , 11(1), 524–533. <a href="https://doi.org/10.1039/c9fo01414d">https://doi.org/10.1039/c9fo01414d</a>                                            |
| Chiarelli, P. G., Pegg, R. B., Dev Kumar, G., & Mis Solval, K. (2021). Exploring the feasibility of developing novel gelatin powders from salted, dried cannonball jellyfish ( <i>Stomolophus meleagris</i> ). <i>Food Bioscience</i> , 44. <a href="https://doi.org/10.1016/j.fbio.2021.101397">https://doi.org/10.1016/j.fbio.2021.101397</a>                                             |
| Chik, C., Kamaruzzan, A. S., Rahim, A. I. A., Lananan, F., Endut, A., Aslamyiah, S., & Kasan, N. A. (2023). Extraction and Characterization of <i>Litopenaeus vannamei</i> 's Shell as Potential Sources of Chitosan Biopolymers. <i>JOURNAL OF RENEWABLE MATERIALS</i> , 11(3), 1181–1197. <a href="https://doi.org/10.32604/jrm.2023.022755">https://doi.org/10.32604/jrm.2023.022755</a> |
| Cho, J.-K., Jin, Y.-G., Rha, S.-J., Kim, S.-J., & Hwang, J.-H. (2014). Biochemical characteristics of four marine fish skins in Korea. <i>Food Chemistry</i> , 159, 200–207. <a href="https://doi.org/10.1016/j.foodchem.2014.03.012">https://doi.org/10.1016/j.foodchem.2014.03.012</a>                                                                                                    |
| Chung, Y.-C. (2006). Improvement of aquaculture wastewater using chitosan of different degrees of deacetylation. <i>Environmental Technology</i> , 27(11), 1199–1208. <a href="https://doi.org/10.1080/09593332708618734">https://doi.org/10.1080/09593332708618734</a>                                                                                                                     |
| Cogollo-Herrera, K., Bonfante-Álvarez, H., De Ávila-Montiel, G., Barros, A. H., & González-Delgado, Á. D. (2018). Techno-economic sensitivity analysis of large scale chitosan production process from shrimp shell wastes. <i>Chemical Engineering Transactions</i> , 70, 2179–2184. <a href="https://doi.org/10.3303/CET1870364">https://doi.org/10.3303/CET1870364</a>                   |
| Coughlin, R. W., Deshaies, M. R., & Davis, E. M. (1990). Chitosan in crab shell wastes purifies electroplating wastewater. <i>Environmental Progress</i> , 9(1), 35–39. <a href="https://doi.org/10.1002/ep.670090116">https://doi.org/10.1002/ep.670090116</a>                                                                                                                             |
| Cutajar, N., Lia, F., Deidun, A., Galdies, J., Arizza, V., & Zammit Mangion, M. (2022). Turning Waste into A Resource: Isolation and Characterization of High-Quality Collagen and Oils from Atlantic Bluefin Tuna Discards. <i>Applied Sciences (Switzerland)</i> , 12(3). <a href="https://doi.org/10.3390/app12031542">https://doi.org/10.3390/app12031542</a>                           |
| Das, J., Dey, P., Chakraborty, T., Saleem, K., Nagendra, R., & Banerjee, P. (2018). Utilization of marine industry waste derived collagen hydrolysate as peroxide inhibition agents in lipid-based food. <i>Journal of Food Processing and Preservation</i> , 42(2). <a href="https://doi.org/10.1111/jfpp.13430">https://doi.org/10.1111/jfpp.13430</a>                                    |
| Dave, D., Liu, Y., Clark, L., Dave, N., Trenholm, S., & Westcott, J. (2019). Availability of marine collagen from Newfoundland fisheries and aquaculture waste resources. <i>Bioresource Technology Reports</i> , 7. <a href="https://doi.org/10.1016/j.biteb.2019.100271">https://doi.org/10.1016/j.biteb.2019.100271</a>                                                                  |
| Dawood, M. A. O., Gewaily, M. S., Soliman, A. A., Shukry, M., Amer, A. A., Younis, E. M., Abdel-Warith, A.-W. A., Van Doan, H., Saad, A. H., Aboubakr, M., Abdel-Latif, H. M. R., & Faal, S. E. (2020). Marine-Derived                                                                                                                                                                      |

Chitosan Nanoparticles Improved the Intestinal Histo-Morphometrical Features in Association with the Health and Immune Response of Grey Mullet (*Liza ramada*). *Marine Drugs*, 18(12). <https://doi.org/10.3390/md18120611>

de la Paz, N., Fernández, M., López, O., García, C., Nogueira, A., Torres, L., Turiño, W., & Heinämäki, J. (2021). Spray drying of chitosan acid salts: Process development, scaling up and physicochemical material characterization. *Marine Drugs*, 19(6). <https://doi.org/10.3390/md19060329>

Dehghani, M. H., Dehghan, A., & Najafpoor, A. (2017). Removing Reactive Red 120 and 196 using chitosan/zeolite composite from aqueous solutions: Kinetics, isotherms, and process optimization. *Journal of Industrial and Engineering Chemistry*, 51, 185–195. <https://doi.org/10.1016/j.jiec.2017.03.001>

Devi, R., & Dhamodharan, R. (2018). Pretreatment in Hot Glycerol for Facile and Green Separation of Chitin from Prawn Shell Waste. *ACS Sustainable Chemistry & Engineering*, 6(1), 846–853. <https://doi.org/10.1021/acssuschemeng.7b03195>

Di Benedetto, C., Barbaglio, A., Martinello, T., Alongi, V., Fassini, D., Cullorà, E., Patruno, M., Bonasoro, F., Barbosa, M. A., Carnevali, M. D. C., Carnevali, M. D. C., & Sugni, M. (2014). Production, characterization and biocompatibility of marine collagen matrices from an alternative and sustainable source: The sea urchin *Paracentrotus lividus*. *Marine Drugs*, 12(9), 4912–4933. <https://doi.org/10.3390/md12094912>

do Vale, D. A., Vieira, C. B., Vidal, M. F., Claudino, R. L., Andrade, F. K., Sousa, J. R., Souza Filho, M. S. M., da Silva, A. L. C., & de Souza, B. W. S. (2021). Chitosan-Based Edible Films Produced from Crab-Uçá (*Ucides cordatus*) Waste: Physicochemical, Mechanical and Antimicrobial Properties. *Journal of Polymers and the Environment*, 29(3), 694–706. <https://doi.org/10.1007/s10924-020-01913-6>

Duasa, J., Husin, A. M., Asmy Mohd Thas Thaker, M., & Rahman, M. P. (2021). An alternative source of collagen for Muslim consumers: halal and environmental concerns. *Journal of Islamic Marketing*. <https://doi.org/10.1108/JIMA-09-2020-0268>

El Harmoudi, H., El Gaini, L., Daoudi, E., Rhazi, M., Boughaleb, Y., El Mhammedi, M. A., Migalska-Zalas, A., & Bakasse, M. (2014). Removal of 2,4-D from aqueous solutions by adsorption processes using two biopolymers: Chitin and chitosan and their optical properties. *Optical Materials*, 36(9), 1471–1477. <https://doi.org/10.1016/j.optmat.2014.03.040>

El-Beltagi, H. S., El-Mahdy, O. M., Mohamed, H. I., & El-Ansary, A. E. (2022). Antioxidants, Antimicrobial, and Anticancer Activities of Purified Chitinase of *Talaromyces funiculosus* Strain CBS 129594 Biosynthesized Using Crustacean Bio-Wastes. *AGRONOMY-BASEL*, 12(11). <https://doi.org/10.3390/agronomy12112818> WE - Science Citation Index Expanded (SCI-EXPANDED)

Elwakeel, K. Z., Al-Bogami, A. S., & Elgarahy, A. M. (2018). Efficient Retention of Chromate from Industrial Wastewater onto a Green Magnetic Polymer Based on Shrimp Peels. *Journal of Polymers and the Environment*, 26(5), 2018–2029. <https://doi.org/10.1007/s10924-017-1096-0>

Eulálio, H. Y. C., Vieira, M., Fideles, T. B., Tomás, H., Silva, S. M. L., Peniche, C. A., & Fook, M. V. L. (2020). Physicochemical properties and cell viability of shrimp chitosan films as affected by film casting solvents. I-potential use as wound dressing. *Materials*, 13(21), 1–18. <https://doi.org/10.3390/ma13215005>

|                                                                                                                                                                                                                                                                                                                                                                                                                                                                                             |
|---------------------------------------------------------------------------------------------------------------------------------------------------------------------------------------------------------------------------------------------------------------------------------------------------------------------------------------------------------------------------------------------------------------------------------------------------------------------------------------------|
| <p>Fabbricino, M., &amp; Gallo, R. (2010). Chromium removal from tannery wastewater using ground shrimp shells. <i>Desalination and Water Treatment</i>, 23(1–3), 194–198. <a href="https://doi.org/10.5004/dwt.2010.2020">https://doi.org/10.5004/dwt.2010.2020</a></p>                                                                                                                                                                                                                    |
| <p>Fan, R., Zhou, D., &amp; Cao, X. (2020). Evaluation of oat <math>\beta</math>-glucan-marine collagen peptide mixed gel and its application as the fat replacer in the sausage products. <i>PLoS ONE</i>, 15(5). <a href="https://doi.org/10.1371/journal.pone.0233447">https://doi.org/10.1371/journal.pone.0233447</a></p>                                                                                                                                                              |
| <p>Fernández-Marín, R., Hernández-Ramos, F., Salaberria, A. M., Andrés, M. Á., Labidi, J., &amp; Fernandes, S. C. M. (2021). Eco-friendly isolation and characterization of nanochitin from different origins by microwave irradiation: Optimization using response surface methodology. <i>International Journal of Biological Macromolecules</i>, 186, 218–226. <a href="https://doi.org/10.1016/j.ijbiomac.2021.07.048">https://doi.org/10.1016/j.ijbiomac.2021.07.048</a></p>           |
| <p>Fontana, R., Marconi, P. C. R., Caputo, A., &amp; Gavalyan, V. B. (2022). Novel Chitosan-Based Schiff Base Compounds: Chemical Characterization and Antimicrobial Activity. <i>Molecules</i>, 27(9). <a href="https://doi.org/10.3390/molecules27092740">https://doi.org/10.3390/molecules27092740</a></p>                                                                                                                                                                               |
| <p>Gadghey, K. K., &amp; Dey, S. (2017). Development of chitin and chitosan from narmada riverside crab shells. <i>International Journal of Mechanical Engineering and Technology</i>, 8(7), 298–307.</p>                                                                                                                                                                                                                                                                                   |
| <p>Gallo, N., Natali, M. L., Quarta, A., Gaballo, A., Terzi, A., Sibillano, T., Giannini, C., De Benedetto, G. E., Lunetti, P., Capobianco, L., Blasi, F. S., Sicuro, A., Corallo, A., Sannino, A., &amp; Salvatore, L. (2022). Aquaponics-Derived Tilapia Skin Collagen for Biomaterials Development. <i>Polymers</i>, 14(9). <a href="https://doi.org/10.3390/polym14091865">https://doi.org/10.3390/polym14091865</a></p>                                                                |
| <p>Gaspar-Pintiliescu, A., Anton, E. D., Iosageanu, A., Berger, D., Matei, C., Mitran, R., Negreanu-Pirjol, T., Craciunescu, O., &amp; Moldovan, L. (2021). Enhanced Wound Healing Activity of Undenatured Type I Collagen Isolated from Discarded Skin of Black Sea Gilthead Bream ( <i>Sparus aurata</i> ) Conditioned as 3D Porous Dressing. <i>Chemistry &amp; Biodiversity</i>, 18(8). <a href="https://doi.org/10.1002/cbdv.202100293">https://doi.org/10.1002/cbdv.202100293</a></p> |
| <p>George, J., &amp; Manjusha, W. (2020). Extraction and Purification of Collagen from Marine Squid <i>Uroteuthis Duvauceli</i>. <i>International Journal of Life Science and Pharma Research</i>, 10(4), 77–89. <a href="https://doi.org/10.22376/ijpbs/lpr.2020.10.4.L77-89">https://doi.org/10.22376/ijpbs/lpr.2020.10.4.L77-89</a></p>                                                                                                                                                  |
| <p>Georgieva, V., Zvezdova, D., &amp; Vlaev, L. (2012). Non-isothermal kinetics of thermal degradation of chitosan. <i>Chemistry Central Journal</i>, 6(1), 81. <a href="https://doi.org/10.1186/1752-153X-6-81">https://doi.org/10.1186/1752-153X-6-81</a></p>                                                                                                                                                                                                                             |
| <p>Gibert, O., &amp; Kumar Rakshit, S. (2005). Cassava starch snack formulation using functional shell fish by-products: mechanical, sorption and geometric properties. <i>Journal of the Science of Food and Agriculture</i>, 85(11), 1938–1946. <a href="https://doi.org/10.1002/jsfa.2200">https://doi.org/10.1002/jsfa.2200</a></p>                                                                                                                                                     |
| <p>Gomes, L. C., Faria, S. I., Valcarcel, J., Vázquez, J. A., Cerqueira, M. A., Pastrana, L., Bourbon, A. I., &amp; Mergulhão, F. J. (2021). The effect of molecular weight on the antimicrobial activity of chitosan from <i>Loligo opalescens</i> for food packaging applications. <i>Marine Drugs</i>, 19(7). <a href="https://doi.org/10.3390/md19070384">https://doi.org/10.3390/md19070384</a></p>                                                                                    |
| <p>Guerra, I. C. D., De Oliveira, P. D. L., Santos, M. M. F., Lúcio, A. S. S. C., Tavares, J. F., Barbosa-Filho, J. M., Madruga, M. S., &amp; De Souza, E. L. (2016). The effects of composite coatings containing chitosan and <i>Mentha</i></p>                                                                                                                                                                                                                                           |

|                                                                                                                                                                                                                                                                                                                                                                                                                                                                  |
|------------------------------------------------------------------------------------------------------------------------------------------------------------------------------------------------------------------------------------------------------------------------------------------------------------------------------------------------------------------------------------------------------------------------------------------------------------------|
| <p>(<i>piperita</i> L. or <i>x villosa</i> Huds) essential oil on postharvest mold occurrence and quality of table grape cv. <i>Isabella</i>. <i>Innovative Food Science and Emerging Technologies</i>, 34, 112–121. <a href="https://doi.org/10.1016/j.ifset.2016.01.008">https://doi.org/10.1016/j.ifset.2016.01.008</a></p>                                                                                                                                   |
| <p>Guo, H., Hong, Z., &amp; Yi, R. (2015). Core-Shell Collagen Peptide Chelated Calcium/Calcium Alginate Nanoparticles from Fish Scales for Calcium Supplementation. <i>Journal of Food Science</i>, 80(7), N1595–N1601. <a href="https://doi.org/10.1111/1750-3841.12912">https://doi.org/10.1111/1750-3841.12912</a></p>                                                                                                                                       |
| <p>Hajiali, F., Vidal, J., Jin, T. Y., de la Garza, L. C., Santos, M., Yang, G. L., &amp; Moores, A. (2022). Extraction of Chitin from Green Crab Shells by Mechanochemistry and Aging. <i>ACS SUSTAINABLE CHEMISTRY &amp; ENGINEERING</i>, 10(34), 11348–11357. <a href="https://doi.org/10.1021/acssuschemeng.2c02966">https://doi.org/10.1021/acssuschemeng.2c02966</a></p>                                                                                   |
| <p>Halal, C. Y., Moura, J. M., &amp; Pinto, L. A. A. (2011). Evaluation of molecular weight of chitosan in thin-layer and spouted bed drying. <i>Journal of Food Process Engineering</i>, 34(1), 160–174. <a href="https://doi.org/10.1111/j.1745-4530.2008.00345.x">https://doi.org/10.1111/j.1745-4530.2008.00345.x</a></p>                                                                                                                                    |
| <p>Hammami, A., Hamdi, M., Abdelhedi, O., Jridi, M., Nasri, M., &amp; Bayoudh, A. (2017). Surfactant- and oxidant-stable alkaline proteases from <i>Bacillus invictae</i>: Characterization and potential applications in chitin extraction and as a detergent additive. <i>International Journal of Biological Macromolecules</i>, 96, 272–281. <a href="https://doi.org/10.1016/j.ijbiomac.2016.12.035">https://doi.org/10.1016/j.ijbiomac.2016.12.035</a></p> |
| <p>Han, S. B., Won, B., Yang, S. chan, &amp; Kim, D. H. (2021). <i>Asterias pectinifera</i> derived collagen peptide-encapsulating elastic nanoliposomes for the cosmetic application. <i>Journal of Industrial and Engineering Chemistry</i>, 98, 289–297. <a href="https://doi.org/10.1016/J.JIEC.2021.03.039">https://doi.org/10.1016/J.JIEC.2021.03.039</a></p>                                                                                              |
| <p>Hazeena, S. H., Hou, C.-Y., Zeng, J.-H., Li, B.-H., Lin, T.-C., Liu, C.-S., Chang, C.-I., Hsieh, S.-L., &amp; Shih, M.-K. (2022). Extraction Optimization and Structural Characteristics of Chitosan from Cuttlefish (<i>S. pharaonis</i> sp.) Bone. <i>Materials</i>, 15(22). <a href="https://doi.org/10.3390/ma15227969">https://doi.org/10.3390/ma15227969</a></p>                                                                                        |
| <p>Hemalatha, T., UmaMaheswari, T., Senthil, R., Krithiga, G., &amp; Anbukkarasi, K. (2017). Efficacy of chitosan films with basil essential oil: perspectives in food packaging. <i>Journal of Food Measurement and Characterization</i>, 11(4), 2160–2170. <a href="https://doi.org/10.1007/s11694-017-9601-7">https://doi.org/10.1007/s11694-017-9601-7</a></p>                                                                                               |
| <p>Heng, T. T., Tey, J. Y., Soon, K. S., &amp; Woo, K. K. (2022). Utilizing Fish Skin of Ikan Belida (<i>Notopterus lopes</i>) as a Source of Collagen: Production and Rheology Properties. <i>Marine Drugs</i>, 20(8). <a href="https://doi.org/10.3390/md20080525">https://doi.org/10.3390/md20080525</a></p>                                                                                                                                                  |
| <p>Hofman, K., Tucker, N., Stanger, J., Staiger, M., Marshall, S., &amp; Hall, B. (2012). Effects of the molecular format of collagen on characteristics of electrospun fibres. <i>Journal of Materials Science</i>, 47(3), 1148–1155. <a href="https://doi.org/10.1007/s10853-011-5775-2">https://doi.org/10.1007/s10853-011-5775-2</a></p>                                                                                                                     |
| <p>Hou, E.-J., Hsieh, Y.-Y., Hsu, T.-W., Huang, C.-S., Lee, Y.-C., Han, Y.-S., &amp; Chu, H.-T. (2022). Using the concept of circular economy to reduce the environmental impact of COVID-19 face mask waste. <i>Sustainable Materials and Technologies</i>, 33. <a href="https://doi.org/10.1016/j.susmat.2022.e00475">https://doi.org/10.1016/j.susmat.2022.e00475</a></p>                                                                                     |



|                                                                                                                                                                                                                                                                                                                                                                                                                                                                                                                                                                     |
|---------------------------------------------------------------------------------------------------------------------------------------------------------------------------------------------------------------------------------------------------------------------------------------------------------------------------------------------------------------------------------------------------------------------------------------------------------------------------------------------------------------------------------------------------------------------|
| <p>Huang, C.-Y., Kuo, C.-H., Wu, C.-H., Ku, M.-W., &amp; Chen, P.-W. (2018). Extraction of crude chitosans from squid (<i>Illex argentinus</i>) pen by a compressional puffing-pretreatment process and evaluation of their antibacterial activity. <i>Food Chemistry</i>, 254, 217–223. <a href="https://doi.org/10.1016/j.foodchem.2018.02.018">https://doi.org/10.1016/j.foodchem.2018.02.018</a></p>                                                                                                                                                            |
| <p>Ilançovan, P., Hein, S., Ng, C.-H., Trung, T. S., &amp; Stevens, W. F. (2006). Production of N-acetyl chitobiose from various chitin substrates using commercial enzymes. <i>Carbohydrate Polymers</i>, 63(2), 245–250. <a href="https://doi.org/10.1016/j.carbpol.2005.08.060">https://doi.org/10.1016/j.carbpol.2005.08.060</a></p>                                                                                                                                                                                                                            |
| <p>Jabeur, F., Mechri, S., Mensi, F., Gharbi, I., Naser, Y. B., Kriaa, M., Bejaoui, N., Bachouche, S., Badis, A., Annane, R., Djellali, M., Sadok, S., &amp; Jaouadi, B. (2022). Extraction and characterization of chitin, chitosan, and protein hydrolysate from the invasive Pacific blue crab, <i>Portunus segnis</i> (Forskål, 1775) having potential biological activities. <i>Environmental Science and Pollution Research</i>, 29(24), 36023–36039. <a href="https://doi.org/10.1007/s11356-021-18398-y">https://doi.org/10.1007/s11356-021-18398-y</a></p> |
| <p>Jadhav, U., &amp; Pillai, A. (2011). Preparation and comparative study of chitosan from shells of different marine and freshwater prawns. <i>Biosciences Biotechnology Research Asia</i>, 8(2), 869–872. <a href="https://doi.org/10.13005/bbra/954">https://doi.org/10.13005/bbra/954</a></p>                                                                                                                                                                                                                                                                   |
| <p>Jaiswal, M., Chauhan, D., &amp; Sankararamkrishnan, N. (2012). Copper chitosan nanocomposite: Synthesis, characterization, and application in removal of organophosphorous pesticide from agricultural runoff. <i>Environmental Science and Pollution Research</i>, 19(6), 2055–2062. <a href="https://doi.org/10.1007/s11356-011-0699-6">https://doi.org/10.1007/s11356-011-0699-6</a></p>                                                                                                                                                                      |
| <p>Jeong, H.-S., Venkatesan, J., &amp; Kim, S.-K. (2013). Isolation and characterization of collagen from marine fish (<i>Thunnus obesus</i>). <i>Biotechnology and Bioprocess Engineering</i>, 18(6), 1185–1191. <a href="https://doi.org/10.1007/s12257-013-0316-2">https://doi.org/10.1007/s12257-013-0316-2</a></p>                                                                                                                                                                                                                                             |
| <p>Jin, T., Liu, T., Jiang, S., Kurdyla, D., Klein, B. A., Michaelis, V. K., Lam, E., Li, J., &amp; Moores, A. (2021). Chitosan nanocrystals synthesis: Via aging and application towards alginate hydrogels for sustainable drug release. <i>Green Chemistry</i>, 23(17), 6527–6537. <a href="https://doi.org/10.1039/d1gc01611c">https://doi.org/10.1039/d1gc01611c</a></p>                                                                                                                                                                                       |
| <p>Kim, S.-C., Heo, S.-Y., Oh, G.-W., Yi, M., &amp; Jung, W.-K. (2022). A 3D-Printed Polycaprolactone/Marine Collagen Scaffold Reinforced with Carbonated Hydroxyapatite from Fish Bones for Bone Regeneration. <i>Marine Drugs</i>, 20(6). <a href="https://doi.org/10.3390/md20060344">https://doi.org/10.3390/md20060344</a></p>                                                                                                                                                                                                                                 |
| <p>Kimura, S. (1971). Studies On Marine Invertebrate Collagens—IV: Structural Difference In Collagens From Cuticle And Intestines of <i>Neanthes Diversicolor</i>. <i>NIPPON SUISAN GAKKAISHI</i>, 37(5), 432–440. <a href="https://doi.org/10.2331/suisan.37.432">https://doi.org/10.2331/suisan.37.432</a></p>                                                                                                                                                                                                                                                    |
| <p>Kimura, S. (1971). Studies On Marine Invertebrate Collagens—III: Characterization of Cuticle Collagens In Annelids. <i>NIPPON SUISAN GAKKAISHI</i>, 37(5), 419–431. <a href="https://doi.org/10.2331/suisan.37.419">https://doi.org/10.2331/suisan.37.419</a></p>                                                                                                                                                                                                                                                                                                |
| <p>Kimura, S. (1969). Studies on Marine Invertebrate Collagens—II. Molecular Properties of Soluble Cuticle Collagen from a Marine Worm, <i>Nereis japonica</i>. <i>NIPPON SUISAN GAKKAISHI</i>, 35(11), 1121–1130. <a href="https://doi.org/10.2331/suisan.35.1121">https://doi.org/10.2331/suisan.35.1121</a></p>                                                                                                                                                                                                                                                  |

|                                                                                                                                                                                                                                                                                                                                                                                                                                                                                                        |
|--------------------------------------------------------------------------------------------------------------------------------------------------------------------------------------------------------------------------------------------------------------------------------------------------------------------------------------------------------------------------------------------------------------------------------------------------------------------------------------------------------|
| Kimura, S., Nagaoka, Y., & Kubota, M. (1969). <i>Studies on Marine Invertebrate Collagens—I. Some Collagens from Crustaceans and Molluscs</i> . NIPPON SUISAN GAKKAISHI, 35(8), 743–748. <a href="https://doi.org/10.2331/suisan.35.743">https://doi.org/10.2331/suisan.35.743</a>                                                                                                                                                                                                                     |
| Kubota, M., Kimura, S., & Kobayashi, N. (1972). <i>Studies on Marine Invertebrate Collagens—VI. Some Properties of Collagen from an Ascidian Halocynthia roretzi</i> . NIPPON SUISAN GAKKAISHI, 38(10), 1163–1169. <a href="https://doi.org/10.2331/suisan.38.1163">https://doi.org/10.2331/suisan.38.1163</a>                                                                                                                                                                                         |
| Kumaran, S., Perianaika Anahas, A. M., Prasannabalaji, N., Karthiga, M., Bharathi, S., Rajasekar, T., Joseph, J., Prasad, S. G., Pandian, S., Pugazhvendan, S. R., Pugazhvendan, S. R., & Aruni, W. (2021). <i>Chitin derivatives of NAG and chitosan nanoparticles from marine disposal yards and their use for economically feasible fish feed development</i> . Chemosphere, 281. <a href="https://doi.org/10.1016/j.chemosphere.2021.130746">https://doi.org/10.1016/j.chemosphere.2021.130746</a> |
| Kumari, S., Rath, P., Sri Hari Kumar, A., & Tiwari, T. N. (2015). <i>Extraction and characterization of chitin and chitosan from fishery waste by chemical method</i> . Environmental Technology and Innovation, 3, 77–85. <a href="https://doi.org/10.1016/j.eti.2015.01.002">https://doi.org/10.1016/j.eti.2015.01.002</a>                                                                                                                                                                           |
| Laaraibi, A., Charhouf, I., Bennamara, A., Abourriche, A., & Berrada, M. (2015). <i>Valorization of marine wastes in a preserving film based on chitosan for food applications</i> . Journal of Materials and Environmental Science, 6(12), 3511–3516.                                                                                                                                                                                                                                                 |
| Lassoued, I., Hajji, S., Mhamdi, S., Jridi, M., Bayoudh, A., Barkia, A., & Nasri, M. (2015). <i>Digestive alkaline proteases from thornback ray ( Raja clavata ): Characteristics and applications</i> . International Journal of Biological Macromolecules, 80, 668–675. <a href="https://doi.org/10.1016/j.ijbiomac.2015.07.038">https://doi.org/10.1016/j.ijbiomac.2015.07.038</a>                                                                                                                  |
| Lassoued, I., Mora, L., Barkia, A., Aristoy, M. C., Nasri, M., & Toldrá, F. (2015). <i>Bioactive peptides identified in thornback ray skin's gelatin hydrolysates by proteases from Bacillus subtilis and Bacillus amyloliquefaciens</i> . Journal of Proteomics, 128, 8–17. <a href="https://doi.org/10.1016/J.JPROT.2015.06.016">https://doi.org/10.1016/J.JPROT.2015.06.016</a>                                                                                                                     |
| LeCorre-Bordes, D. S., Jaksons, P., & Hofman, K. (2017). <i>Mind the gap: Ensuring laboratory-scale testing of an electrospinning product meets commercial-scale needs</i> . Journal of Applied Polymer Science, 134(20). <a href="https://doi.org/10.1002/app.44836">https://doi.org/10.1002/app.44836</a>                                                                                                                                                                                            |
| Lee, J. E., Noh, S. K., & Kim, M. J. (2022). <i>Effects of Enzymatic- and Ultrasound-Assisted Extraction on Physicochemical and Antioxidant Properties of Collagen Hydrolysate Fractions from Alaska Pollack (Theragra chalcogramma) Skin</i> . ANTIOXIDANTS, 11(11). <a href="https://doi.org/10.3390/antiox11112112">https://doi.org/10.3390/antiox11112112</a> WE - Science Citation Index Expanded (SCI-EXPANDED)                                                                                  |
| Liang, T.-W., Hsieh, J.-L., & Wang, S.-L. (2012). <i>Production and purification of a protease, a chitosanase, and chitin oligosaccharides by Bacillus cereus TKU022 fermentation</i> . Carbohydrate Research, 362, 38–46. <a href="https://doi.org/10.1016/j.carres.2012.08.004">https://doi.org/10.1016/j.carres.2012.08.004</a>                                                                                                                                                                     |
| Lima, M., Gomes, L. C., Teixeira-Santos, R., Romeu, M. J., Valcarcel, J., Vazquez, J. A., Cerqueira, M. A., Pastrana, L., Bourbon, A. I., de Jong, E. D., Sjollem, J., & Mergulhao, F. J. (2022). <i>Assessment of the Antibiofilm Performance of Chitosan-Based Surfaces in Marine Environments</i> . INTERNATIONAL JOURNAL OF MOLECULAR                                                                                                                                                              |

SCIENCES, 23(23). <https://doi.org/10.3390/ijms232314647> WE - Science Citation Index Expanded (SCI-EXPANDED)

Lin, F., Rong, H., Lin, J., Yuan, Y., Yu, J., Yu, C., You, C., Wang, S., Sun, Z., & Wen, X. (2020). Enhancement of collagen deposition in swim bladder of Chu's croaker (*Nibea coibor*) by proline: View from in-vitro and in-vivo study. *Aquaculture*, 523. <https://doi.org/10.1016/j.aquaculture.2020.735175>

Liu, D., Huang, J., Wu, C., Liu, C., Huang, R., Wang, W., Yin, T., Yan, X., He, H., & Chen, L. (2019). Purification, characterization, and application for preparation of antioxidant peptides of extracellular protease from *Pseudoalteromonas* sp. H2. *Molecules*, 24(18). <https://doi.org/10.3390/molecules24183373>

Lopes, C., Antelo, L. T., Franco-Uría, A., Alonso, A. A., & Pérez-Martín, R. (2018). Chitin production from crustacean biomass: Sustainability assessment of chemical and enzymatic processes. *Journal of Cleaner Production*, 172, 4140–4151. <https://doi.org/10.1016/j.jclepro.2017.01.082>

Machałowski, T., Czajka, M., Petrenko, I., Meissner, H., Schimpf, C., Rafaja, D., Ziętek, J., Dzięgiel, B., Adaszek, Ł., Voronkina, A., Kovalchuk, V., Jaroszewicz, J., Fursov, A., Rahimi-Nasrabadi, M., Stawski, D., Bechmann, N., Jesionowski, T., & Ehrlich, H. (2020). Functionalization of 3D Chitinous Skeletal Scaffolds of Sponge Origin Using Silver Nanoparticles and Their Antibacterial Properties. *Marine Drugs*, 18(6), 304. <https://doi.org/10.3390/md18060304>

Maeda, H., Hosomi, R., Chiba, U., & Fukunaga, K. (2013). Chemical composition of salmon ovary outer membrane and its protein increases fecal mucins content in c57bl/6j and type 2 diabetic/obese kk-ay mice. *Foods*, 2(3), 415–429. <https://doi.org/10.3390/foods2030415>

Magnacca, G., Guerretta, F., Vizintin, A., Benzi, P., Valsania, M. C., & Nisticò, R. (2018). Preparation, characterization and environmental/electrochemical energy storage testing of low-cost biochar from natural chitin obtained via pyrolysis at mild conditions. *Applied Surface Science*, 427, 883–893. <https://doi.org/10.1016/j.apsusc.2017.07.277>

Manni, L., Ghorbel-Bellaaj, O., Jellouli, K., Younes, I., & Nasri, M. (2010). Extraction and characterization of chitin, chitosan, and protein hydrolysates prepared from shrimp waste by treatment with crude protease from *Bacillus cereus* SV1. *Applied Biochemistry and Biotechnology*, 162(2), 345–357. <https://doi.org/10.1007/s12010-009-8846-y>

Marimuthu, R., Devarayan, K., Sukumaran, M., Suresh, A., & Ravichandran, S. (2022). Piezoelectric property from processed crustacean shells. *Materials Today: Proceedings*, 58, 942–946. <https://doi.org/10.1016/j.matpr.2021.12.402>

Martins, E., Diogo, G. S., Pires, R., Reis, R. L., & Silva, T. H. (2022). 3D Biocomposites Comprising Marine Collagen and Silica-Based Materials Inspired on the Composition of Marine Sponge Skeletons Envisaging Bone Tissue Regeneration. *Marine Drugs*, 20(11). <https://doi.org/10.3390/md20110718>

Martins, E., Fernandes, R., Alves, A. L., Sousa, R. O., Reis, R. L., & Silva, T. H. (2022). Skin Byproducts of *Reinhardtius hippoglossoides* (Greenland Halibut) as Ecosustainable Source of Marine Collagen. *Applied Sciences (Switzerland)*, 12(21). <https://doi.org/10.3390/app122111282>

|                                                                                                                                                                                                                                                                                                                                                                                                                                                                          |
|--------------------------------------------------------------------------------------------------------------------------------------------------------------------------------------------------------------------------------------------------------------------------------------------------------------------------------------------------------------------------------------------------------------------------------------------------------------------------|
| <p>Mathew, G. M., Puthiyamadham, A., Sasikumar, K., Ashoor, S., &amp; Sukumaran, R. K. (2021). Biological treatment of prawn shell wastes for valorization and waste management. <i>Bioresource Technology Reports</i>, 15. <a href="https://doi.org/10.1016/j.biteb.2021.100788">https://doi.org/10.1016/j.biteb.2021.100788</a></p>                                                                                                                                    |
| <p>Maulani, D., Nofianti, K., Sugijanto, N., &amp; Kartosentono, S. (2021). An Eco-Friendly Absorption Method of Cu<sup>2+</sup>, Cd<sup>2+</sup>, and Pb<sup>2+</sup> Using the Shells and Chitosan Derived from <i>Solen vagina</i>. <i>Journal of Ecological Engineering</i>, 22(7), 212–222. <a href="https://doi.org/10.12911/22998993/139118">https://doi.org/10.12911/22998993/139118</a></p>                                                                     |
| <p>Mauro, M., Pinto, P., Settanni, L., Puccio, V., Vazzana, M., Hornsby, B. L., Fabbri, A., Di Stefano, V., Barone, G., &amp; Arizza, V. (2022). Chitosan Film Functionalized with Grape Seed Oil- Preliminary Evaluation of Antimicrobial Activity. <i>SUSTAINABILITY</i>, 14(9). <a href="https://doi.org/10.3390/su14095410">https://doi.org/10.3390/su14095410</a> WE - Science Citation Index Expanded (SCI-EXPANDED) WE - Social Science Citation Index (SSCI)</p> |
| <p>McReynolds, C., Adrien, A., de Fraissinette, N. B., Olza, S., &amp; Fernandes, S. C. M. (2022). Deep eutectic solvents for the extraction of <math>\beta</math>-chitin from <i>Loligo vulgaris</i> squid pens: a sustainable way to valorize fishery by-products. <i>Biomass Conversion and Biorefinery</i>. <a href="https://doi.org/10.1007/s13399-022-03569-9">https://doi.org/10.1007/s13399-022-03569-9</a></p>                                                  |
| <p>Melotti, L., Martinello, T., Perazzi, A., Iacopetti, I., Ferrario, C., Sugni, M., Sacchetto, R., &amp; Patruno, M. (2021). A Prototype Skin Substitute, Made of Recycled Marine Collagen, Improves the Skin Regeneration of Sheep. <i>Animals</i>, 11(5), 1219. <a href="https://doi.org/10.3390/ani11051219">https://doi.org/10.3390/ani11051219</a></p>                                                                                                             |
| <p>Merz, C. R. (2019). Physicochemical and Colligative Investigation of <math>\alpha</math> (Shrimp Shell)- And <math>\beta</math> (Squid Pen)-Chitosan Membranes: Concentration-Gradient-Driven Water Flux and Ion Transport for Salinity Gradient Power and Separation Process Operations. <i>ACS Omega</i>, 4(25), 21027–21040. <a href="https://doi.org/10.1021/acsomega.9b02357">https://doi.org/10.1021/acsomega.9b02357</a></p>                                   |
| <p>Miron, A., Sarbu, A., Zaharia, A., Sandu, T., Iovu, H., Fierascu, R. C., Neagu, A. L., Chiriac, A. L., &amp; Iordache, T. V. (2022). A Top-Down Procedure for Synthesizing Calcium Carbonate-Enriched Chitosan from Shrimp Shell Wastes. <i>GELS</i>, 8(11). <a href="https://doi.org/10.3390/gels8110742">https://doi.org/10.3390/gels8110742</a> WE - Science Citation Index Expanded (SCI-EXPANDED)</p>                                                            |
| <p>Mittal, A., Singh, A., Aluko, R. E., &amp; Benjakul, S. (2021). Pacific white shrimp (<i>Litopenaeus vannamei</i>) shell chitosan and the conjugate with epigallocatechin gallate: Antioxidative and antimicrobial activities. <i>Journal of Food Biochemistry</i>, 45(1). <a href="https://doi.org/10.1111/jfbc.13569">https://doi.org/10.1111/jfbc.13569</a></p>                                                                                                    |
| <p>Mizuta, S., Yoshinaka, R., Sato, M., &amp; Sakaguchi, M. (1994). Characterization of Collagen in the Muscle of Several Crustacean Species in Association with Raw Meat Texture. <i>Fisheries Science</i>, 60(3), 323–328. <a href="https://doi.org/10.2331/fishsci.60.323">https://doi.org/10.2331/fishsci.60.323</a></p>                                                                                                                                             |
| <p>Mohanasrinivasan, V., Mishra, M., Paliwal, J. S., Singh, S. K., Selvarajan, E., Suganthi, V., &amp; Subathra Devi, C. (2014). Studies on heavy metal removal efficiency and antibacterial activity of chitosan prepared from shrimp shell waste. <i>3 Biotech</i>, 4(2), 167–175. <a href="https://doi.org/10.1007/s13205-013-0140-6">https://doi.org/10.1007/s13205-013-0140-6</a></p>                                                                               |
| <p>Moreno-Sader, K. A., Martinez-Consuegra, J. D., &amp; González-Delgado, Á. D. (2021). Development of a biorefinery approach for shrimp processing in North-Colombia: Process simulation and sustainability assessment. <i>Environmental Technology &amp; Innovation</i>, 22, 101461. <a href="https://doi.org/10.1016/j.eti.2021.101461">https://doi.org/10.1016/j.eti.2021.101461</a></p>                                                                            |

|                                                                                                                                                                                                                                                                                                                                                                                                                                                              |
|--------------------------------------------------------------------------------------------------------------------------------------------------------------------------------------------------------------------------------------------------------------------------------------------------------------------------------------------------------------------------------------------------------------------------------------------------------------|
| Morganti, P. (2016). New horizon in cosmetic dermatology. <i>Journal of Applied Cosmetology</i> , 34(1–2), 15–24.                                                                                                                                                                                                                                                                                                                                            |
| Morganti, P. (2015). Innovative and sustainable bio-polymers for household and beauty care products. Final results of the EU BIO-MIMETIC Project. <i>Journal of Applied Cosmetology</i> , 33(1–2), 67–84.                                                                                                                                                                                                                                                    |
| Mushi, N. E., Kochumalayil, J., Cervin, N. T., Zhou, Q., & Berglund, L. A. (2016). Nanostructurally Controlled Hydrogel Based on Small-Diameter Native Chitin Nanofibers: Preparation, Structure, and Properties. <i>ChemSusChem</i> , 9(9), 989–995. <a href="https://doi.org/10.1002/cssc.201501697">https://doi.org/10.1002/cssc.201501697</a>                                                                                                            |
| Muthukumar, T., Prakash, D., Anbarasu, K., Kumar, B. S., & Sastry, T. P. (2014). Effect of collagen sponge incorporating <i>Macrotyloma uniflorum</i> extract on full-thickness wound healing by down-regulation of matrix metalloproteinases and inflammatory markers. <i>RSC Advances</i> , 4(109), 64267–64276. <a href="https://doi.org/10.1039/c4ra11959b">https://doi.org/10.1039/c4ra11959b</a>                                                       |
| Muthumari, K., Anand, M., & Maruthupandy, M. (2016). Collagen Extract from Marine Finfish Scales as a Potential Mosquito Larvicide. <i>Protein Journal</i> , 35(6), 391–400. <a href="https://doi.org/10.1007/s10930-016-9685-7">https://doi.org/10.1007/s10930-016-9685-7</a>                                                                                                                                                                               |
| Nerdy, N., Lestari, P., Simorangkir, D., Aulianshah, V., Yusuf, F., & Bakri, T. K. (2022). COMPARISON OF CHITOSAN FROM CRAB SHELL WASTE AND SHRIMP SHELL WASTE AS NATURAL ADSORBENT AGAINST HEAVY METALS AND DYES. <i>International Journal of Applied Pharmaceutics</i> , 14(2), 181–185. <a href="https://doi.org/10.22159/ijap.2022v14i2.43560">https://doi.org/10.22159/ijap.2022v14i2.43560</a>                                                         |
| Nessa, F., Khan, S. A., & Al Khatib, F. M. A. (2010). Production and characterization of chitosan from shrimp ( <i>Penaeus semisulcatus</i> ) shell waste of UAE. <i>Pakistan Journal of Scientific and Industrial Research</i> , 53(1), 52–58.                                                                                                                                                                                                              |
| Nishimoto, M., Mizuta, S., Yoshinaka, R., Park, E. Y., Nakamura, Y., & Sato, K. (2009). Characterization and Comparison of Collagens Extracted from the Digestive Tract and Skin of a Japanese Amberjack <i>Seriola quinqueradiata</i> . <i>Journal of Food Biochemistry</i> , 33(6), 777–789. <a href="https://doi.org/10.1111/j.1745-4514.2009.00250.x">https://doi.org/10.1111/j.1745-4514.2009.00250.x</a>                                               |
| Nunes, C., Maricato, É., Cunha, Â., Rocha, M. A. M., Santos, S., Ferreira, P., Silva, M. A., Rodrigues, A., Amado, O., Coimbra, J., Silva, D., Moreira, A., Mendo, S., Lopes da Silva, J. A., Pereira, E., Rocha, S. M., & Coimbra, M. A. (2016). Chitosan–genipin film, a sustainable methodology for wine preservation. <i>Green Chemistry</i> , 18(19), 5331–5341. <a href="https://doi.org/10.1039/C6GC01621A">https://doi.org/10.1039/C6GC01621A</a>    |
| Omar, B. A., Elmasry, R., Eita, A., Soliman, M. M., El-Tahan, A. M., & Sitohy, M. (2022). Upgrading the preparation of high-quality chitosan from <i>Procambarus clarkii</i> wastes over the traditional isolation of shrimp chitosan. <i>SAUDI JOURNAL OF BIOLOGICAL SCIENCES</i> , 29(2), 911–919. <a href="https://doi.org/10.1016/j.sjbs.2021.10.014">https://doi.org/10.1016/j.sjbs.2021.10.014</a> WE - Science Citation Index Expanded (SCI-EXPANDED) |
| Omidinasab, M., Rahbar, N., Ahmadi, M., Kakavandi, B., Ghanbari, F., Kyzas, G. Z., Martinez, S. S., & Jaafarzadeh, N. (2018). Removal of vanadium and palladium ions by adsorption onto magnetic chitosan nanoparticles. <i>Environmental Science and Pollution Research</i> , 25(34), 34262–34276. <a href="https://doi.org/10.1007/s11356-018-3137-1">https://doi.org/10.1007/s11356-018-3137-1</a>                                                        |

|                                                                                                                                                                                                                                                                                                                                                                                                                                                              |
|--------------------------------------------------------------------------------------------------------------------------------------------------------------------------------------------------------------------------------------------------------------------------------------------------------------------------------------------------------------------------------------------------------------------------------------------------------------|
| <p>Pachapur, V. L., Guemiza, K., Rouissi, T., Sarma, S. J., &amp; Brar, S. K. (2016). Novel biological and chemical methods of chitin extraction from crustacean waste using saline water. <i>Journal of Chemical Technology and Biotechnology</i>, 91(8), 2331–2339. <a href="https://doi.org/10.1002/jctb.4821">https://doi.org/10.1002/jctb.4821</a></p>                                                                                                  |
| <p>Pacheco, N., Garnica-Gonzalez, M., Gimeno, M., Bárzana, E., Trombotto, S., David, L., &amp; Shirai, K. (2011). Structural characterization of chitin and chitosan obtained by biological and chemical methods. <i>Biomacromolecules</i>, 12(9), 3285–3290. <a href="https://doi.org/10.1021/bm200750t">https://doi.org/10.1021/bm200750t</a></p>                                                                                                          |
| <p>Paduretu, C.-C., Apetroaei, M. R., Apetroaei, G. M., Atodiresei, D. V., &amp; Rau, I. (2020). Dyes adsorption by using different types of chitosan for decontamination of cleaning waters from chemical carriers. <i>Journal of Environmental Protection and Ecology</i>, 21(1), 28–36.</p>                                                                                                                                                               |
| <p>Pădurețu, C.-C., Apetroaei, M. R., Rău, I., &amp; Schroder, V. (2018). Characterization of chitosan extracted from different romanian black sea crustaceans. <i>UPB Scientific Bulletin, Series B: Chemistry and Materials Science</i>, 80(3), 13–24.</p>                                                                                                                                                                                                 |
| <p>Pallela, R., Bojja, S., &amp; Janapala, V. R. (2011). Biochemical and biophysical characterization of collagens of marine sponge, <i>Ircinia fusca</i> (Porifera: Demospongiae: Irciniidae). <i>International Journal of Biological Macromolecules</i>, 49(1), 85–92. <a href="https://doi.org/10.1016/j.ijbiomac.2011.03.019">https://doi.org/10.1016/j.ijbiomac.2011.03.019</a></p>                                                                     |
| <p>Palma, G., Casals, P., &amp; Cardenas, G. (2005). Synthesis and characterization of new chitosan-O-ethyl phosphonate. <i>Journal of the Chilean Chemical Society</i>, 50(4), 719–724. <a href="https://doi.org/10.4067/s0717-97072005000400013">https://doi.org/10.4067/s0717-97072005000400013</a></p>                                                                                                                                                   |
| <p>Pandara, D. P., Masengi, K. W. A., Tamuntuan, G. H., Angmalisang, P. A., Wuntu, A. D., Ferdy, F., Bobanto, M. D., &amp; Sompotan, A. F. (2022). The potential of fish scale application as photothermal raw material in seawater desalination. <i>AACL Bioflux</i>, 15(4), 1617–1629.</p>                                                                                                                                                                 |
| <p>Paradiso, F., Fitzgerald, J., Yao, S., Barry, F., Taraballi, F., Gonzalez, D., Conlan, R. S., &amp; Francis, L. (2019). Marine Collagen Substrates for 2D and 3D Ovarian Cancer Cell Systems. <i>Frontiers in Bioengineering and Biotechnology</i>, 7. <a href="https://doi.org/10.3389/fbioe.2019.00343">https://doi.org/10.3389/fbioe.2019.00343</a></p>                                                                                                |
| <p>Pati, S., Sarkar, T., Sheikh, H. I., Bharadwaj, K. K., Mohapatra, P. K., Chatterji, A., Dash, B. P., Edinur, H. A., &amp; Nelson, B. R. (2021). <math>\gamma</math>-Irradiated Chitosan From <i>Carcinoscorpius rotundicauda</i> (Latreille, 1802) Improves the Shelf Life of Refrigerated Aquatic Products. <i>Frontiers in Marine Science</i>, 8. <a href="https://doi.org/10.3389/fmars.2021.664961">https://doi.org/10.3389/fmars.2021.664961</a></p> |
| <p>Paul, T., Halder, S. K., Das, A., Ghosh, K., Mandal, A., Payra, P., Barman, P., Das Mohapatra, P. K., Pati, B. R., &amp; Mondal, K. C. (2015). Production of chitin and bioactive materials from Black tiger shrimp (<i>Penaeus monodon</i>) shell waste by the treatment of bacterial protease cocktail. <i>3 Biotech</i>, 5(4), 483–493. <a href="https://doi.org/10.1007/s13205-014-0245-6">https://doi.org/10.1007/s13205-014-0245-6</a></p>          |
| <p>Phuong, P. T. D., Trung, T. S., Stevens, W. F., Minh, N. C., Bao, H. N. D., &amp; Hoa, N. V. (2021). Valorization of Heavy Waste of Modern Intensive Shrimp Farming as a Potential Source for Chitin and Chitosan Production. <i>Waste and Biomass Valorization</i>, 13(2), 823–830. <a href="https://doi.org/10.1007/s12649-021-01557-0">https://doi.org/10.1007/s12649-021-01557-0</a></p>                                                              |

|                                                                                                                                                                                                                                                                                                                                                                                                                                  |
|----------------------------------------------------------------------------------------------------------------------------------------------------------------------------------------------------------------------------------------------------------------------------------------------------------------------------------------------------------------------------------------------------------------------------------|
| <p>Prelipcean, A.-M., Iosageanu, A., Gaspar-Pintiliescu, A., Moldovan, L., Craciunescu, O., Negreanu-Pirjol, T., Negreanu-Pirjol, B., Mitran, R.-A., Marin, M., &amp; D'Amora, U. (2022). Marine and Agro-Industrial By-Products Valorization Intended for Topical Formulations in Wound Healing Applications. <i>Materials</i>, 15(10). <a href="https://doi.org/10.3390/ma15103507">https://doi.org/10.3390/ma15103507</a></p> |
| <p>Rahali, A., Riazi, A., Moussaoui, B., Boucherdoud, A., &amp; Bektaş, N. (2020). Decolourisation of methylene blue and congo red dye solutions by adsorption using chitosan. <i>Desalination and Water Treatment</i>, 198, 422–433. <a href="https://doi.org/10.5004/dwt.2020.26093">https://doi.org/10.5004/dwt.2020.26093</a></p>                                                                                            |
| <p>Rashid, T. U., Rahman, M. M., Kabir, S., Shamsuddin, S. M., &amp; Khan, M. A. (2012). A new approach for the preparation of chitosan from <math>\gamma</math>-irradiation of prawn shell: Effects of radiation on the characteristics of chitosan. <i>Polymer International</i>, 61(8), 1302–1308. <a href="https://doi.org/10.1002/pi.4207">https://doi.org/10.1002/pi.4207</a></p>                                          |
| <p>Rastian, Z., Pütz, S., Wang, Y., Kumar, S., Fleissner, F., Weidner, T., &amp; Parekh, S. H. (2018). Type I Collagen from Jellyfish <i>Catostylus mosaicus</i> for Biomaterial Applications. <i>ACS Biomaterials Science and Engineering</i>, 4(6), 2115–2125. <a href="https://doi.org/10.1021/acsbiomaterials.7b00979">https://doi.org/10.1021/acsbiomaterials.7b00979</a></p>                                               |
| <p>Rethinam, S., Nivedita, P., Hemalatha, T., Vedakumari, S. W., &amp; Sastry, T. P. (2016). A possible wound dressing material from marine food waste. <i>International Journal of Artificial Organs</i>, 39(10), 509–517. <a href="https://doi.org/10.5301/ijao.5000531">https://doi.org/10.5301/ijao.5000531</a></p>                                                                                                          |
| <p>Rissouli, L., Benicha, M., &amp; Chabbi, M. (2016). Contribution to the elimination of Linuron by the adsorption process using Chitin and Chitosan biopolymers. <i>Journal of Materials and Environmental Science</i>, 7(2), 531–540.</p>                                                                                                                                                                                     |
| <p>Rizzi, V., Gubitosa, J., Fini, P., Romita, R., Nuzzo, S., &amp; Cosma, P. (2019). Chitosan biopolymer from crab shell as recyclable film to remove/recover in batch ketoprofen from water: Understanding the factors affecting the adsorption process. <i>Materials</i>, 12(23). <a href="https://doi.org/10.3390/ma122333810">https://doi.org/10.3390/ma122333810</a></p>                                                    |
| <p>Rodríguez, F., Morán, L., González, G., Troncoso, E., &amp; Zúñiga, R. N. (2017). Collagen extraction from mussel byssus: a new marine collagen source with physicochemical properties of industrial interest. <i>Journal of Food Science and Technology</i>, 54(5), 1228–1238. <a href="https://doi.org/10.1007/s13197-017-2566-z">https://doi.org/10.1007/s13197-017-2566-z</a></p>                                         |
| <p>Rodriguez-Veiga, I., Acosta, N., Aranaz, I., &amp; Dobrzycka-Kraheil, A. (2022). Exploring <i>Saduria entomon</i> (Crustacea Isopoda) as a New Source for Chitin and Chitosan Isolation. <i>International Journal of Molecular Sciences</i>, 23(24). <a href="https://doi.org/10.3390/ijms232416125">https://doi.org/10.3390/ijms232416125</a></p>                                                                            |
| <p>Rong, H., Lin, F., Ning, L., Wu, K., Chen, B., Zheng, J., Limbu, S. M., &amp; Wen, X. (2022). Cloning, tissue distribution and mRNA expression of type I collagen alpha 1 gene from Chu's croaker (<i>Nibea coibor</i>). <i>Gene</i>, 824, 146441. <a href="https://doi.org/10.1016/j.gene.2022.146441">https://doi.org/10.1016/j.gene.2022.146441</a></p>                                                                    |
| <p>Rumengan, I. F. M., Suptijah, P., Wullur, S., &amp; Talumepa, A. (2017). Characterization of chitin extracted from fish scales of marine fish species purchased from local markets in North Sulawesi, Indonesia. <i>IOP Conference Series: Earth and Environmental Science</i>, 89, 012028. <a href="https://doi.org/10.1088/1755-1315/89/1/012028">https://doi.org/10.1088/1755-1315/89/1/012028</a></p>                     |

|                                                                                                                                                                                                                                                                                                                                                                                                                                                                                                                                     |
|-------------------------------------------------------------------------------------------------------------------------------------------------------------------------------------------------------------------------------------------------------------------------------------------------------------------------------------------------------------------------------------------------------------------------------------------------------------------------------------------------------------------------------------|
| <p>Salazar, R., Salas-Gomez, V., Alvarado, A. A., &amp; Baykara, H. (2022). Preparation, Characterization and Evaluation of Antibacterial Properties of Polylactide-Polyethylene Glycol-Chitosan Active Composite Films. <i>Polymers</i>, 14(11). <a href="https://doi.org/10.3390/polym14112266">https://doi.org/10.3390/polym14112266</a></p>                                                                                                                                                                                     |
| <p>Salazar-Leyva, J. A., Lizardi-Mendoza, J., Ramirez-Suarez, J. C., Valenzuela-Soto, E. M., Ezquerro-Brauer, J. M., Castillo-Yañez, F. J., &amp; Pacheco-Aguilar, R. (2013). Acidic proteases from monterey sardine (<i>Sardinops sagax caerulea</i>) Immobilized on shrimp waste chitin and chitosan supports: Searching for a by-product catalytic system. <i>Applied Biochemistry and Biotechnology</i>, 171(3), 795–805. <a href="https://doi.org/10.1007/s12010-013-0407-8">https://doi.org/10.1007/s12010-013-0407-8</a></p> |
| <p>Samiei, M. H., Jamili, S., Nikukar, H., &amp; Razban, V. (2022). Isolation, characterization and biocompatibility evaluation of collagen from <i>Thunnus tonggol</i> skin. <i>IRANIAN JOURNAL OF FISHERIES SCIENCES</i>, 21(2), 568–589. <a href="https://doi.org/10.22092/ijfs.2022.126579">https://doi.org/10.22092/ijfs.2022.126579</a> WE - Science Citation Index Expanded (SCI-EXPANDED)</p>                                                                                                                               |
| <p>Sánchez-Duarte, R. G., Sánchez-Machado, D. I., López-Cervantes, J., &amp; Correa-Murrieta, M. A. (2012). Adsorption of allura red dye by cross-linked chitosan from shrimp waste. <i>Water Science and Technology</i>, 65(4), 618–623. <a href="https://doi.org/10.2166/wst.2012.900">https://doi.org/10.2166/wst.2012.900</a></p>                                                                                                                                                                                               |
| <p>Sanz, B., Sanchez, A. A., Tangey, B., Gilmore, K., Yue, Z., Liu, X., &amp; Wallace, G. (2021). Light cross-linkable marine collagen for coaxial printing of a 3D model of neuromuscular junction formation. <i>Biomedicines</i>, 9(1), 1–19. <a href="https://doi.org/10.3390/biomedicines9010016">https://doi.org/10.3390/biomedicines9010016</a></p>                                                                                                                                                                           |
| <p>Sari, E., Herawati, Anshori, U., &amp; Nurmayulis. (2019). Biocoagulant of blood based on chitosan nanoparticle from crustacea. <i>Journal of Physics: Conference Series</i>, 1246(1). <a href="https://doi.org/10.1088/1742-6596/1246/1/012055">https://doi.org/10.1088/1742-6596/1246/1/012055</a></p>                                                                                                                                                                                                                         |
| <p>Seixas, M. J., Martins, E., Reis, R. L., &amp; Silva, T. H. (2020). Extraction and Characterization of Collagen from Elasmobranch Byproducts for Potential Biomaterial Use. <i>Marine Drugs</i>, 18(12). <a href="https://doi.org/10.3390/md18120617">https://doi.org/10.3390/md18120617</a></p>                                                                                                                                                                                                                                 |
| <p>Selvakumar, G., Kuttalam, I., Mukundan, S., &amp; Lonchin, S. (2021). Valorization of toxic discarded fish skin for biomedical application. <i>Journal of Cleaner Production</i>, 323. <a href="https://doi.org/10.1016/j.jclepro.2021.129147">https://doi.org/10.1016/j.jclepro.2021.129147</a></p>                                                                                                                                                                                                                             |
| <p>Shamshina, J. L., &amp; Abidi, N. (2022). Isolation of Chitin Nano-whiskers Directly from Crustacean Biomass Waste in a Single Step with Acidic Ionic Liquids. <i>ACS SUSTAINABLE CHEMISTRY &amp; ENGINEERING</i>, 10(36), 11846–11855. <a href="https://doi.org/10.1021/acssuschemeng.2c02461">https://doi.org/10.1021/acssuschemeng.2c02461</a></p>                                                                                                                                                                            |
| <p>Siddiqui, Y. D., Arief, E. M., Yusoff, A., Suzina, A. H., &amp; Abdullah, S. Y. (2013). Isolation of pepsin-solubilized collagen (PSC) from crude collagen extracted from body wall of sea cucumber (<i>Bohadschia spp.</i>). <i>International Journal of Pharmacy and Pharmaceutical Sciences</i>, 5(SUPPL. 2), 555–559.</p>                                                                                                                                                                                                    |
| <p>Sila, A., Mlaik, N., Sayari, N., Balti, R., &amp; Bougatef, A. (2014). Chitin and Chitosan Extracted from Shrimp Waste Using Fish Proteases Aided Process: Efficiency of Chitosan in the Treatment of Unhairing Effluents. <i>Journal of Polymers and the Environment</i>, 22(1), 78–87. <a href="https://doi.org/10.1007/s10924-013-0598-7">https://doi.org/10.1007/s10924-013-0598-7</a></p>                                                                                                                                   |
| <p>Silva, J. C., Barros, A. A., Aroso, I. M., Fassini, D., Silva, T. H., Reis, R. L., &amp; Duarte, A. R. C. (2016). Extraction of Collagen/Gelatin from the Marine Demosponge <i>Chondrosia reniformis</i> (Nardo, 1847) Using Water Acidified</p>                                                                                                                                                                                                                                                                                 |



|                                                                                                                                                                                                                                                                                                                                                                                                                                         |
|-----------------------------------------------------------------------------------------------------------------------------------------------------------------------------------------------------------------------------------------------------------------------------------------------------------------------------------------------------------------------------------------------------------------------------------------|
| with Carbon Dioxide - Process Optimization. <i>Industrial and Engineering Chemistry Research</i> , 55(25), 6922–6930. <a href="https://doi.org/10.1021/acs.iecr.6b00523">https://doi.org/10.1021/acs.iecr.6b00523</a>                                                                                                                                                                                                                   |
| Silva, R. S. G., Bandeira, S. F., & Pinto, L. A. A. (2014). Characteristics and chemical composition of skins gelatin from cobia ( <i>Rachycentron canadum</i> ). <i>LWT</i> , 57(2), 580–585. <a href="https://doi.org/10.1016/j.lwt.2014.02.026">https://doi.org/10.1016/j.lwt.2014.02.026</a>                                                                                                                                        |
| Singh, A., Benjakul, S., & Prodpran, T. (2019). Ultrasound-Assisted Extraction of Chitosan from Squid Pen: Molecular Characterization and Fat Binding Capacity. <i>Journal of Food Science</i> , 84(2), 224–234. <a href="https://doi.org/10.1111/1750-3841.14439">https://doi.org/10.1111/1750-3841.14439</a>                                                                                                                          |
| Sinha, S., Tripathi, P., & Chand, S. (2012). A New Bifunctional Chitosanase Enzyme from <i>Streptomyces</i> sp. and Its Application in Production of Antioxidant Chitooligosaccharides. <i>Applied Biochemistry and Biotechnology</i> , 167(5), 1029–1039. <a href="https://doi.org/10.1007/s12010-012-9546-6">https://doi.org/10.1007/s12010-012-9546-6</a>                                                                            |
| Sivakami, M. S., Gomathi, T., Venkatesan, J., Jeong, H.-S., Kim, S.-K., & Sudha, P. N. (2013). Preparation and characterization of nano chitosan for treatment wastewaters. <i>International Journal of Biological Macromolecules</i> , 57, 204–212. <a href="https://doi.org/10.1016/j.ijbiomac.2013.03.005">https://doi.org/10.1016/j.ijbiomac.2013.03.005</a>                                                                        |
| Sivakumar, P., Arichandran, R., Suguna, L., Mariappan, M., & Chandrakasan, G. (2000). The composition and characteristics of skin and muscle collagens from a freshwater catfish grown in biologically treated tannery effluent water. <i>Journal of Fish Biology</i> , 56(4), 999–1012. <a href="https://doi.org/10.1006/jfbi.1999.1225">https://doi.org/10.1006/jfbi.1999.1225</a>                                                    |
| Song, E., Yeon Kim, S., Chun, T., Byun, H.-J., & Lee, Y. M. (2006). Collagen scaffolds derived from a marine source and their biocompatibility. <i>Biomaterials</i> , 27(15), 2951–2961. <a href="https://doi.org/10.1016/j.biomaterials.2006.01.015">https://doi.org/10.1016/j.biomaterials.2006.01.015</a>                                                                                                                            |
| Song, X., Zhang, B., Cao, Y., Liu, B., & Chen, B. (2022). Shrimp-waste based dispersant as oil spill treating agent: Biodegradation of dispersant and dispersed oil. <i>Journal of Hazardous Materials</i> , 439, 129617. <a href="https://doi.org/10.1016/j.jhazmat.2022.129617">https://doi.org/10.1016/j.jhazmat.2022.129617</a>                                                                                                     |
| Sousa, R. O., Alves, A. L., Carvalho, D. N., Martins, E., Oliveira, C., Silva, T. H., & Reis, R. L. (2020). Acid and enzymatic extraction of collagen from Atlantic cod ( <i>Gadus Morhua</i> ) swim bladders envisaging health-related applications. <i>Journal of Biomaterials Science, Polymer Edition</i> , 31(1), 20–37. <a href="https://doi.org/10.1080/09205063.2019.1669313">https://doi.org/10.1080/09205063.2019.1669313</a> |
| Sun, T.-C., Yan, B.-Y., Ning, X.-C., Tang, Z.-Y., Hui, C., Hu, M.-Z., Ramakrishna, S., Long, Y.-Z., & Zhang, J. (2022). A nanofiber hydrogel derived entirely from ocean biomass for wound healing. <i>Nanoscale Advances</i> , 5(1), 160–170. <a href="https://doi.org/10.1039/d2na00535b">https://doi.org/10.1039/d2na00535b</a>                                                                                                      |
| Sun, W. -Q., Payne, G. F., Moas, M. S. G. L., Chu, J. H., & Wallace, K. K. (1992). Tyrosinase Reaction/Chitosan Adsorption for Removing Phenols from Wastewater. <i>Biotechnology Progress</i> , 8(3), 179–186. <a href="https://doi.org/10.1021/bp00015a002">https://doi.org/10.1021/bp00015a002</a>                                                                                                                                   |
| Tan, Y. N., Lee, P. P., & Chen, W. N. (2020). Microbial extraction of chitin from seafood waste using sugars derived from fruit waste-stream. <i>AMB Express</i> , 10(1). <a href="https://doi.org/10.1186/s13568-020-0954-7">https://doi.org/10.1186/s13568-020-0954-7</a>                                                                                                                                                             |

|                                                                                                                                                                                                                                                                                                                                                                                                                                                                                                   |
|---------------------------------------------------------------------------------------------------------------------------------------------------------------------------------------------------------------------------------------------------------------------------------------------------------------------------------------------------------------------------------------------------------------------------------------------------------------------------------------------------|
| <p>Thomas, R., Fukamizo, T., &amp; Suginta, W. (2022). Bioeconomic production of high-quality chitobiose from chitin food wastes using an in-house chitinase from <i>Vibrio campbellii</i>. <i>Bioresources and Bioprocessing</i>, 9(1), 86. <a href="https://doi.org/10.1186/s40643-022-00574-8">https://doi.org/10.1186/s40643-022-00574-8</a></p>                                                                                                                                              |
| <p>Tran, T. N., Doan, C. T., Nguyen, M. T., Nguyen, V. B., Vo, T. P. K., Nguyen, A. D., &amp; Wang, S.-L. (2019). An Exochitinase with N-Acetyl-<math>\beta</math>-Glucosaminidase-Like Activity from Shrimp Head Conversion by <i>Streptomyces speibonae</i> and Its Application in Hydrolyzing <math>\beta</math>-Chitin Powder to Produce N-Acetyl-d-Glucosamine. <i>Polymers</i>, 11(10), 1600. <a href="https://doi.org/10.3390/polym11101600">https://doi.org/10.3390/polym11101600</a></p> |
| <p>Trung, T. S., Tram, L. H., Van Tan, N., Van Hoa, N., Minh, N. C., Loc, P. T., &amp; Stevens, W. F. (2020). Improved method for production of chitin and chitosan from shrimp shells. <i>Carbohydrate Research</i>, 489, 107913. <a href="https://doi.org/10.1016/j.carres.2020.107913">https://doi.org/10.1016/j.carres.2020.107913</a></p>                                                                                                                                                    |
| <p>Tzeng, T.-W., Bhaumik, P., &amp; Chung, P.-W. (2019). Understanding the production of 5-hydroxymethylfurfural (HMF) from chitosan using solid acids. <i>Molecular Catalysis</i>, 479, 110627. <a href="https://doi.org/10.1016/j.mcat.2019.110627">https://doi.org/10.1016/j.mcat.2019.110627</a></p>                                                                                                                                                                                          |
| <p>Tziveleka, L.-A., Kikionis, S., Karkatzoulis, L., Bethanis, K., Roussis, V., &amp; Ioannou, E. (2022). Valorization of Fish Waste: Isolation and Characterization of Acid- and Pepsin-Soluble Collagen from the Scales of Mediterranean Fish and Fabrication of Collagen-Based Nanofibrous Scaffolds. <i>Marine Drugs</i>, 20(11). <a href="https://doi.org/10.3390/md20110664">https://doi.org/10.3390/md20110664</a></p>                                                                     |
| <p>Uranga, J., Etxabide, A., Cabezudo, S., de la Caba, K., &amp; Guerrero, P. (2020). Valorization of marine-derived biowaste to develop chitin/fish gelatin products as bioactive carriers and moisture scavengers. <i>Science of The Total Environment</i>, 706, 135747. <a href="https://doi.org/10.1016/j.scitotenv.2019.135747">https://doi.org/10.1016/j.scitotenv.2019.135747</a></p>                                                                                                      |
| <p>Valcarcel, J., Fraguas, J., Hermida-Merino, C., Hermida-Merino, D., Piñeiro, M. M., &amp; Vázquez, J. A. (2021). Production and physicochemical characterization of gelatin and collagen hydrolysates from turbot skin waste generated by aquaculture activities. <i>Marine Drugs</i>, 19(9). <a href="https://doi.org/10.3390/md19090491">https://doi.org/10.3390/md19090491</a></p>                                                                                                          |
| <p>Veeruraj, A., Arumugam, M., &amp; Balasubramanian, T. (2013). Isolation and characterization of thermostable collagen from the marine eel-fish (<i>Evenchelys macrura</i>). <i>Process Biochemistry</i>, 48(10), 1592–1602. <a href="https://doi.org/10.1016/j.procbio.2013.07.011">https://doi.org/10.1016/j.procbio.2013.07.011</a></p>                                                                                                                                                      |
| <p>Vendramin, V., Spinato, G., &amp; Vincenzi, S. (2021). Shellfish chitosan potential in wine clarification. <i>Applied Sciences (Switzerland)</i>, 11(10). <a href="https://doi.org/10.3390/app11104417">https://doi.org/10.3390/app11104417</a></p>                                                                                                                                                                                                                                            |
| <p>Venkatachalam, A., Govinda Rajulu, M. B., Thirunavukkarasu, N., &amp; Suryanarayanan, T. S. (2015). Endophytic fungi of marine algae and seagrasses: A novel source of chitin modifying enzymes. <i>Mycosphere</i>, 6(3), 345–355. <a href="https://doi.org/10.5943/MYCOSPHERE/6/3/10">https://doi.org/10.5943/MYCOSPHERE/6/3/10</a></p>                                                                                                                                                       |
| <p>Vishnu Prasad, &amp; Senthil Kumar, K. (2015). Adsorption studies on treatment of cooking oil mill effluent using crab shell chitosan. <i>Journal of Chemical and Pharmaceutical Research</i>, 7(11), 19–29.</p>                                                                                                                                                                                                                                                                               |

|                                                                                                                                                                                                                                                                                                                                                                                                                                                     |
|-----------------------------------------------------------------------------------------------------------------------------------------------------------------------------------------------------------------------------------------------------------------------------------------------------------------------------------------------------------------------------------------------------------------------------------------------------|
| Wada, S., Ichikawa, H., & Tatsumi, K. (1993). Removal of phenols from wastewater by soluble and immobilized tyrosinase. <i>Biotechnology and Bioengineering</i> , 42(7), 854–858. <a href="https://doi.org/10.1002/bit.260420710">https://doi.org/10.1002/bit.260420710</a>                                                                                                                                                                         |
| Wang, Y. H., Yang, Y. Q., Wang, R., Zhu, Y. L., Yang, P. B., Lin, Z. N., Wang, Z. H., & Cong, W. (2022). Effectively inhibiting the degradation of chitin during extraction from crustacean waste via a novel deep eutectic solvent aqueous solution. <i>PROCESS BIOCHEMISTRY</i> , 121, 142–151. <a href="https://doi.org/10.1016/j.procbio.2022.06.029">https://doi.org/10.1016/j.procbio.2022.06.029</a>                                         |
| Wang, Y. H., Yang, Y. Q., Wang, R., Zhu, Y. L., Yang, P. B., Lin, Z. N., Wang, Z. H., & Cong, W. (2022). Efficient extraction of chitin from crustacean waste via a novel ternary natural deep eutectic solvents. <i>CARBOHYDRATE POLYMERS</i> , 286. <a href="https://doi.org/10.1016/j.carbpol.2022.119281">https://doi.org/10.1016/j.carbpol.2022.119281</a>                                                                                     |
| Wegner, L., Kinoshita, A., de Paiva, F. F. G., de Almeida Soares, P. N., Santana, W., & Pinto, E. M. (2021). Only carapace or the entire cephalothorax: which is best to obtain chitosan from shrimp fishery waste? <i>Journal of Material Cycles and Waste Management</i> , 23(5), 1831–1837. <a href="https://doi.org/10.1007/s10163-021-01254-z">https://doi.org/10.1007/s10163-021-01254-z</a>                                                  |
| Widyastuti, W., Setiawan, F., Al Afandy, C., Irawan, A., Laila, A., Juliasih, N. L. G. R., Setiawan, W. A., Arai, M., Hendri, J., & Setiawan, A. (2022). Antifungal Agent Chitooligosaccharides Derived from Solid-State Fermentation of Shrimp Shell Waste by <i>Pseudonocardia antitumoralis</i> 18D36-A1. <i>Fermentation</i> , 8(8), 353. <a href="https://doi.org/10.3390/fermentation8080353">https://doi.org/10.3390/fermentation8080353</a> |
| Wisser, D., Wisser, F. M., Raschke, S., Klein, N., Leistner, M., Grothe, J., Brunner, E., & Kaskel, S. (2015). Biological Chitin-MOF Composites with Hierarchical Pore Systems for Air-Filtration Applications. <i>Angewandte Chemie International Edition</i> , 54(43), 12588–12591. <a href="https://doi.org/10.1002/anie.201504572">https://doi.org/10.1002/anie.201504572</a>                                                                   |
| Wu, F.-C., Tseng, R.-L., & Juang, R.-S. (2000). Comparative adsorption of metal and dye on flake- and bead-types of chitosans prepared from fishery wastes. <i>Journal of Hazardous Materials</i> , 73(1), 63–75. <a href="https://doi.org/10.1016/S0304-3894(99)00168-5">https://doi.org/10.1016/S0304-3894(99)00168-5</a>                                                                                                                         |
| Xu, Y., Bajaj, M., Schneider, R., Grage, S. L., Ulrich, A. S., Winter, J., & Gallert, C. (2013). Transformation of the matrix structure of shrimp shells during bacterial deproteinization and demineralization. <i>Microbial Cell Factories</i> , 12(1). <a href="https://doi.org/10.1186/1475-2859-12-90">https://doi.org/10.1186/1475-2859-12-90</a>                                                                                             |
| Xu, Y. J., Han, X. L., & Li, Y. (2010). Effect of marine collagen peptides on long bone development in growing rats. <i>Journal of the Science of Food and Agriculture</i> , 90(9), 1485–1491. <a href="https://doi.org/10.1002/jsfa.3972">https://doi.org/10.1002/jsfa.3972</a>                                                                                                                                                                    |
| Yamamoto, K., Yoshizawa, Y., Yanagiguchi, K., Ikeda, T., Yamada, S., & Hayashi, Y. (2015). The Characterization of Fish (Tilapia) Collagen Sponge as a Biomaterial. <i>International Journal of Polymer Science</i> , 2015. <a href="https://doi.org/10.1155/2015/957385">https://doi.org/10.1155/2015/957385</a>                                                                                                                                   |
| Yang, F., Jin, S., & Tang, Y. (2019). Marine collagen peptides promote cell proliferation of NIH-3T3 fibroblasts via NF-κB signaling pathway. <i>Molecules</i> , 24(22). <a href="https://doi.org/10.3390/molecules24224201">https://doi.org/10.3390/molecules24224201</a>                                                                                                                                                                          |
| Youcefi, F., Ouahab, L. W., Borsali, L., & Bengherbi, S. E. (2022). Heavy metal removal efficiency and antibacterial activity of chitosan beads prepared from crustacean waste. In <i>MATERIALS TODAY-PROCEEDINGS</i> (Vol. 53,                                                                                                                                                                                                                     |

|                                                                                                                                                                                                                                                                                                                                                                                                                                   |
|-----------------------------------------------------------------------------------------------------------------------------------------------------------------------------------------------------------------------------------------------------------------------------------------------------------------------------------------------------------------------------------------------------------------------------------|
| Issue 11th Conference on Solid State Surfaces and Interfaces, pp. 265–268).<br><a href="https://doi.org/10.1016/j.matpr.2022.01.089">https://doi.org/10.1016/j.matpr.2022.01.089</a>                                                                                                                                                                                                                                              |
| Zhang, H., Yu, H., Qian, Y., & Chen, S. (2017). Production of chitin & chitosan using successive three-step microbial fermentation. <i>Journal of Polymer Materials</i> , 34(1), 123–127.                                                                                                                                                                                                                                         |
| Zhang, H., Yun, S., Song, L., Zhang, Y., & Zhao, Y. (2017). The preparation and characterization of chitin and chitosan under large-scale submerged fermentation level using shrimp by-products as substrate. <i>International Journal of Biological Macromolecules</i> , 96, 334–339. <a href="https://doi.org/10.1016/j.ijbiomac.2016.12.017">https://doi.org/10.1016/j.ijbiomac.2016.12.017</a>                                |
| Zhang, J., Duan, R., Huang, L., Song, Y., & Regenstein, J. M. (2014). Characterisation of acid-soluble and pepsin-solubilised collagen from jellyfish ( <i>Cyanea nozakii</i> Kishinouye). <i>Food Chemistry</i> , 150, 22–26. <a href="https://doi.org/10.1016/j.foodchem.2013.10.116">https://doi.org/10.1016/j.foodchem.2013.10.116</a>                                                                                        |
| Zhang, Y., Zhou, Z., Liu, Y., Cao, Y., He, S., Huo, F., Qin, C., Yao, B., & Ringø, E. (2014). High-yield production of a chitinase from <i>Aeromonas veronii</i> B565 as a potential feed supplement for warm-water aquaculture. <i>Applied Microbiology and Biotechnology</i> , 98(4), 1651–1662. <a href="https://doi.org/10.1007/s00253-013-5023-6">https://doi.org/10.1007/s00253-013-5023-6</a>                              |
| Zhang, Z., Wang, J., Ding, Y., Dai, X., & Li, Y. (2011). Oral administration of marine collagen peptides from Chum Salmon skin enhances cutaneous wound healing and angiogenesis in rats. <i>Journal of the Science of Food and Agriculture</i> , 91(12), 2173–2179. <a href="https://doi.org/10.1002/jsfa.4435">https://doi.org/10.1002/jsfa.4435</a>                                                                            |
| Zhao, Y., & Li, J. (2016). Ascidian bioresources: Common and variant chemical compositions and exploitation strategy - Examples of <i>Halocynthia roretzi</i> , <i>Styela plicata</i> , <i>Ascidia</i> sp. and <i>Ciona intestinalis</i> . <i>Zeitschrift Fur Naturforschung - Section C Journal of Biosciences</i> , 71(5–6), 165–180. <a href="https://doi.org/10.1515/znc-2016-0012">https://doi.org/10.1515/znc-2016-0012</a> |
| Zheng, J., Tian, X., Xu, B., Yuan, F., Gong, J., & Yang, Z. (2020). Collagen peptides from swim bladders of giant croaker ( <i>Nibea japonica</i> ) and their protective effects against H <sub>2</sub> O <sub>2</sub> -induced oxidative damage toward human umbilical vein endothelial cells. <i>Marine Drugs</i> , 18(8). <a href="https://doi.org/10.3390/MD18080430">https://doi.org/10.3390/MD18080430</a>                  |
| Zuorro, A., Moreno-Sader, K. A., & González-Delgado, Á. D. (2021). Evaluating the feasibility of a pilot-scale shrimp biorefinery via techno-economic analysis. <i>Journal of Cleaner Production</i> , 320. <a href="https://doi.org/10.1016/j.jclepro.2021.128740">https://doi.org/10.1016/j.jclepro.2021.128740</a>                                                                                                             |
| Zuorro, A., Moreno-Sader, K. A. K. A. K. A., & González-Delgado, Á. D. Á. D. (2020). Economic Evaluation and Techno-Economic Sensitivity Analysis of a Mass Integrated Shrimp Biorefinery in North Colombia. <i>Polymers</i> , 12(10), 1–14. <a href="https://doi.org/10.3390/polym12102397">https://doi.org/10.3390/polym12102397</a>                                                                                            |
